# Supplementary material for: Gene Expression Profiling Confirms the Dosage-Dependent Additive Neuroprotective Effects of Jasminoidin in a Mouse Model of Ischemia-Reperfusion Injury
Source: Biomed Res Int. 2018 May 16;2018:2785636. doi: 10.1155/2018/2785636 (PMC5976973; doi:10.1155/2018/2785636)
Supplement: Supplementary Materials — Supplementary Table 1: there are differentially expressed genes (DEGs) in JA and 2·JA groups. [file 2785636.f1.xls]

## Sheet: JA-DEGs
Array ID	M3 B_ratio	M3 B t-test p-value	M3 B_flags	Gene	unigene	Description	comment	title	gene	cytoband	locuslink	express	chromosome	count	summary	go
AA124857	1.986	0.000948	P	proline dehydrogenase	Mm.28456	proline dehydrogenase		proline dehydrogenase	Prodh		19125	kidney ; mammary gland ; gall bladder ; liver ; visual cortex ; placenta ; whole brain ; embryo ; diaphragm ; whole body ; Thymus ; placenta and extra embryonic tissue ; whole skin ; skin ; pooled lung tumors ; Liver ; inner ear ; cortex ; tumor, metastatic to mammary ; tumor, gross tissue ; lung ; branchial arches ; salivary gland ; intestinal mucosa ; bladder ; Hematopoietic Stem Cell (Lin-/c-K…	16	95		GO: molecular function|proline dehydrogenase activity|ISS|GO:0004657|MGI|10192398 GO: biological process|proline catabolism|IEA|GO:0006562|MGI|na GO: biological process|proline metabolism|IEA|GO:0006560|MGI|na GO: cellular component|mitochondrion|IEA|GO:0005739|MGI|na GO: biological process|glutamate biosynthesis|IEA|GO:0006537|MGI|na GO: molecular function|oxidoreductase activity|IEA|GO:0016491|…
AA162153	2.334	0.00766	P	colony stimulating factor 1,macrophage	Mm.795	colony stimulating factor 1,macrophage		colony stimulating factor 1 (macrophage)	Csf1		12977	whole body ; E9.5 whole embryo ; Thymus ; heart ; uterus ; lung ; liver and lung ; skin ; ovary and uterus ; tumor, gross tissue ; pancreas ; lymph node ; primary cultures of Sertoli cells ; diencephalon ; Osteoblast ; whole eye ; Spleen ; mammary gland ; bone marrow ; spinal cord ; aorta and vein ; tumor, biopsy sample ; Mesenchymal stem cell ; embryo ; head ; pooled mammary gland tumors ; adipo…	3	164		GO: molecular function|cytokine activity|IEA|GO:0005125|MGI|na GO: molecular function|growth factor activity|IEA|GO:0008083|MGI|na GO: cellular component|integral to membrane|TAS|GO:0016021|MGI|12466851 GO: cellular component|extracellular space|TAS|GO:0005615|MGI|12466851
AA272843	2.454	0.000978	P	coagulation factor 5	Mm.12900	coagulation factor 5		coagulation factor V	F5		14067	liver ; bone ; Whole brain ; whole brain ; Liver ; diaphragm ; infiltrating ductal carcinoma ; liver tumor ; Hematopoietic Stem Cell (Lin-/c-Kit+/Sca-1+) ; gall bladder ; blood	1	25		GO: molecular function|copper ion binding|ISS|GO:0005507|MGI|12466851 GO: biological process|blood coagulation|IEA|GO:0007596|MGI|na GO: biological process|cell adhesion|ISS|GO:0007155|MGI|12466851 GO: cellular component|extracellular space|TAS|GO:0005615|MGI|12466851
AA518595	2.287	0.0112	P,A	matrinlin 2	Mm.321748	matrinlin 2		Transcribed sequence with moderate similarity to protein sp:O00339 (H.sapiens) MTN2_HUMAN Matrilin-2			0	eyeball ; olfactory brain ; testis ; cecum ; spontaneous tumor, metastatic to mammary. Stem cell origin. ; pituitary gland ; sympathetic ganglion ; medulla oblongata ; gonad ; olfactory mucosa ; urinary bladder ; vagina ; skin ; visual cortex ; mammary gland ; xiphoid cartilage ; head ; embryo ; thymus ; Laser-captured isthmal cells from tox176 transgenic mice ; whole eye ; whole skin ; hypothala…		171
AA671573	3.657	0.000258	A	chemokine (c-c)receptor 5	Mm.14302	chemokine (c-c)receptor 5		chemokine (C-C motif) receptor 5	Ccr5		12774	Hematopoietic Stem Cell (Lin-/c-Kit-/Sca-1+) ; Spleen ; whole body ; bone marrow ; whole eye ; lymph node ; mammary gland ; uterus ; tumor, metastatic to mammary ; aorta and vein ; spinal ganglion ; kidney ; infiltrating ductal carcinoma ; adipose ; spontaneous tumor, metastatic to mammary. Stem cell origin.	9	187		GO: molecular function|G-protein coupled receptor activity|IEA|GO:0004930|MGI|na GO: biological process|G-protein coupled receptor protein signaling pathway|IEA|GO:0007186|MGI|na GO: biological process|chemotaxis|IEA|GO:0006935|MGI|na GO: biological process|defense response|IMP|GO:0006952|MGI|10528159 GO: cellular component|integral to membrane|TAS|GO:0016021|MGI|12466851 GO: molecular function|C…
AA980349	1.709	0.000835	P	glutathione peroxidase 2	Mm.57225	glutathione peroxidase 2		glutathione peroxidase 2	Gpx2		14776	colon epithelia progenitor cells ; Pooled thyroids from 5 mice ; lung ; small intestine ; tumor, gross tissue ; colon ; bowel ; Organ of Corti/Ear ; mammary gland ; pancreas ; spontaneous tumor, metastatic to mammary. Stem cell origin.	12	38		GO: molecular function|peroxidase activity|IEA|GO:0004601|MGI|na GO: molecular function|glutathione peroxidase activity|ISS|GO:0004602|MGI|9637305 GO: biological process|response to oxidative stress|IEA|GO:0006979|MGI|na GO: cellular component|cytosol|TAS|GO:0005829|MGI|9315306 GO: molecular function|oxidoreductase activity|IEA|GO:0016491|MGI|na
AF016189	2.918	0.00172	A	SMAD3 (mSmad3) mRNA, complete cds	Mm.7320	SMAD3 (mSmad3) mRNA, complete cds		MAD homolog 3 (Drosophila)	Smad3		17127	embryo ; Whole brain ; Pooled - Molar ; whole eye ; whole embryo including extraembryonic tissues at 8.5-days postcoitum ; pancreas ; Upper Head ; whole brain ; whole embryo including extraembryonic tissues at 13.5-days postcoitum ; Embryonic Stem Cell ; whole embryo including extraembryonic tissues at 10.5-days postcoitum ; lymph node ; Thymus ; head ; primary cultures of Sertoli cells ; optic v…	9	170		GO: molecular function|transcription factor binding|IPI|GO:0008134|MGI|9702197 GO: molecular function|protein binding|IPI|GO:0005515|MGI|11711431,12543979 GO: molecular function|transcription factor activity|IDA|GO:0003700|MGI|12466851,12943993 GO: biological process|SMAD protein heteromerization|IEA|GO:0007183|MGI|na GO: biological process|transforming growth factor beta receptor signaling pathw…
AF020184	2.591	0.000173	P,A	neuronal calcium sensor-1 (NCS-1) mRNA, complete cds	Mm.249318	neuronal calcium sensor-1 (NCS-1) mRNA, complete cds		frequenin homolog (Drosophila)	Freq	2 B	14299	whole brain ; embryo ; Upper Head ; whole skin ; mammary gland ; whole eye ; Thymus ; embryonic body between diaphragm region and neck ; inner ear ; diencephalon ; cerebellum ; corpus striatum ; spinal ganglion ; mandible ; branchial arches ; tumor, gross tissue ; Mesenchymal stem cell ; neural retina ; visual cortex ; Whole brain ; Osteoblast ; submandibular gland ; brain ; sympathetic ganglion …	2	146	NULL	NULL
AF020711	1.841	0.00927	P	calcium-activated potassium channal beta subnit;maxi K channal beta subnit;BK channal beta subnit;SLO beta;K beta	Mm.6206	calcium-activated potassium channal beta subnit;maxi K channal beta subnit;BK channal beta subnit;SLO beta;K beta		potassium large conductance calcium-activated channel, subfamily M, beta member 1	Kcnmb1	11 A4	16533	hypothalamus ; Thymus ; spontaneous tumor, metastatic to mammary. Stem cell origin. ; uterus ; stomach ; Total pancreas ; spinal cord	11	22		GO: molecular function|ion channel activity|IEA|GO:0005216|MGI|na GO: molecular function|calcium-activated potassium channel activity|ISS|GO:0015269|MGI|12466851 GO: molecular function|potassium channel activity|IEA|GO:0005267|MGI|na GO: biological process|potassium ion transport|IEA|GO:0006813|MGI|na GO: cellular component|membrane|ISS|GO:0016020|MGI|12466851 GO: cellular component|integral to m…
AF036355	2.946	0.000332	P	SH2 domain-containing putative adapter SH2-B mRNA	Mm.8538	SH2 domain-containing putative adapter SH2-B mRNA		SH2-B PH domain containing signaling mediator 1	Sh2bpsm1		20399	whole brain ; spermatocytes, pooled from multiple mice ; spinal cord ; Whole brain ; E6.5 whole embryo ; small intestinal epithelial progenitors ; eye ; Gastric Epithelial Progenitor ; colon epithelia progenitor cells ; whole eye ; Upper Head ; Embryonic Stem Cell ; embryo ; heart ; Thymus ; RPE/choroid ; Laser-captured isthmal cells from tox176 transgenic mice ; lymph node ; Liver ; fetus ; mamm…	7	222		GO: molecular function|protein binding|IPI|GO:0005515|MGI|11786545 GO: biological process|intracellular signaling cascade|ISS|GO:0007242|MGI|12466851 GO: biological process|cell motility|IDA|GO:0006928|MGI|11786545 GO: biological process|lamellipodium biogenesis|IDA|GO:0030032|MGI|11786545 GO: cellular component|ruffles|TAS|GO:0001726|MGI|11786545
AF055668	2.009	0.0112	P,A	apoptosis-linked gene 4, deltaC form (Alg-4) Mrna	Mm.329589	apoptosis-linked gene 4, deltaC form (Alg-4) Mrna		programmed cell death protein 11	Pdcd11	18	18572	E9.5 whole embryo ; E6.5 whole embryo ; Whole brain ; Upper Head ; Embryonic Stem Cell ; 4-cell stage embryo ; thymus ; infiltrating ductal carcinoma ; Thymus ; tumor, biopsy sample ; whole brain ; Mesenchymal stem cell ; testis ; Trophoblast stem cell	18	30		GO: biological process|regulation of transcription, DNA-dependent|IDA|GO:0006355|MGI|10229231 GO: biological process|apoptosis|IDA|GO:0006915|MGI|10229231 GO: cellular component|cytosol|IDA|GO:0005829|MGI|10229231
AF069542	1.872	0.0122	P,A	NF-KB essential modulator;IKB kinase gamma subnit (IKK-GAMMA)essential regulatory subnit	Mm.12967	NF-KB essential modulator;IKB kinase gamma subnit (IKK-GAMMA)essential regulatory subnit		inhibitor of kappaB kinase gamma	Ikbkg	X A7.1	16151	mammary gland ; whole eye ; primary cultures of Sertoli cells ; whole brain ; inner ear ; diencephalon ; Blastocyst ; pancreas ; brain ; Rathke's pouches ; whole body ; activated spleen ; whole embryo including extraembryonic tissues at 11.5-days postcoitum ; embryo ; Spleen ; liver ; fetus ; heart ; head ; uterus ; Thymus ; skin ; ovary and uterus ; colon ; pituitary gland ; testis ; macrophage …	X	254		GO: biological process|regulation of transcription, DNA-dependent|IEA|GO:0006355|MGI|na GO: cellular component|nucleus|IEA|GO:0005634|MGI|na GO: molecular function|kinase activity|IEA|GO:0016301|MGI|na GO: biological process|B-cell homeostasis|IMP|GO:0001782|MGI|12235208
AF122923	4.214	0.000418	P	inhibitory factor-1 mRNA, complete cds.	Mm.32831	inhibitory factor-1 mRNA, complete cds.		Wnt inhibitory factor 1	Wif1	10 D2	24117	inner ear ; head ; testis ; cerebellum ; mammary gland ; embryonic body between diaphragm region and neck ; urinary bladder ; bone ; hypothalamus ; aorta and vein ; corpora quadrigemina ; tumor, gross tissue ; cortex ; spinal ganglion ; eyeball ; heart ; stomach ; lung ; tumor, biopsy sample ; spontaneous tumor, metastatic to mammary. Stem cell origin. ; tumor, metastatic to mammary ; whole body …	10	110		GO: molecular function|protein-tyrosine kinase activity|IEA|GO:0004713|MGI|na GO: molecular function|structural molecule activity|IEA|GO:0005198|MGI|na GO: biological process|development|IEA|GO:0007275|MGI|na GO: cellular component|extracellular space|TAS|GO:0005615|MGI|12466851 GO: biological process|Wnt receptor signaling pathway|IEA|GO:0016055|MGI|na
AF132726	2.153	0.000977	P	FLASH (Flash) mRNA	Mm.22279	FLASH (Flash) mRNA		caspase 8 associated protein 2	Casp8ap2		26885	Upper Head ; 8-cell stage embryo ; embryo ; 4-cell stage embryo ; E9.5 whole embryo ; whole eye ; pancreas ; whole brain ; brain ; Newborn Kidney ; Embryonic Stem Cell ; kidney ; uterus ; liver ; mullerian duct includes surrounding region ; craniofacial tissues ; in vitro fertilized eggs ; hypothalamus ; blastocyst ; embryonic body between diaphragm region and neck ; ovary ; mammary gland ; tumor…	4	115		GO: molecular function|caspase activator activity|IDA|GO:0008656|MGI|10235259 GO: molecular function|protein binding|IPI|GO:0005515|MGI|10235259 GO: biological process|caspase activation|IDA|GO:0006919|MGI|10235259 GO: biological process|induction of apoptosis via death domain receptors|IDA|GO:0008625|MGI|10235259 GO: molecular function|apoptotic protease activator activity|IDA|GO:0016505|MGI|102…
AF343352	1.898	0.000215	P	Nkd mRNA	Mm.30219	Nkd mRNA		naked cuticle 1 homolog (Drosophila)	Nkd1	8 C3	93960	embryo ; Pooled thyroids from 5 mice ; whole embryo including extraembryonic tissues at 13.5-days postcoitum ; whole skin ; Liver ; head ; eye ; olfactory brain ; urinary bladder ; spinal cord ; cerebellum ; spinal ganglion ; eyeball ; spontaneous tumor, metastatic to mammary. Stem cell origin. ; branchial arches ; salivary gland ; liver ; in vitro fertilized eggs ; pituitary gland ; whole eye ; …	8	102		GO: molecular function|calcium ion binding|ISS|GO:0005509|MGI|12466851
AF384162	4.286	0.000461	A	diacylglycerol acyltransferase 2-like protein mRNA	Mm.41325	diacylglycerol acyltransferase 2-like protein mRNA		monoacylglycerol O-acyltransferase 1	Mogat1	1 C4	68393	kidney ; mammary gland ; stomach ; spleen ; medulla oblongata ; Brain ; whole body	1	43		GO: molecular function|acyltransferase activity|IEA|GO:0008415|MGI|na GO: molecular function|transferase activity|IEA|GO:0016740|MGI|na
AJ237590	5.852	2.23e-05	A	BARHL1 protein	Mm.21390	BARHL1 protein		BarH-like 1 (Drosophila)	Barhl1		54422	cerebellum ; head ; whole brain	2	33		GO: molecular function|transcription factor activity|ISS|GO:0003700|MGI|12466851 GO: biological process|perception of sound|IMP|GO:0007605|MGI|12091321 GO: biological process|regulation of transcription, DNA-dependent|ISS|GO:0006355|MGI|12466851 GO: cellular component|nucleus|ISS|GO:0005634|MGI|12466851
AJ243963	3.402	0.00302	P	mRNA for dickkopf-2 (dkk-2 gene).	Mm.103593	mRNA for dickkopf-2 (dkk-2 gene).		dickkopf homolog 2 (Xenopus laevis)	Dkk2	3 G3	56811	whole joints ; whole body ; Upper Head ; fetus ; lymph node ; head ; Newborn Kidney ; lung ; whole eye ; eye ; whole brain ; kidney ; tumor, gross tissue ; eyeball ; embryonic body between diaphragm region and neck ; Male genital ridge/mesonephros ; Total pancreas ; olfactory epithelium	3	47		GO: biological process|development|IEA|GO:0007275|MGI|na GO: cellular component|extracellular|ISS|GO:0005576|MGI|10495270 GO: cellular component|extracellular space|TAS|GO:0005615|MGI|12466851 GO: biological process|Wnt receptor signaling pathway|IEA|GO:0016055|MGI|na
AJ250669	6.172	0.00615	A	gab1 gene for GRB2-associated binding protein 1	Mm.277409	gab1 gene for GRB2-associated binding protein 1		growth factor receptor bound protein 2-associated protein 1	Gab1		14388	Embryonic Stem Cell ; kidney ; whole eye ; heart ; pancreas ; Thymus ; whole embryo including extraembryonic tissues at 13.5-days postcoitum ; E6.5 whole embryo ; E9.5 whole embryo ; embryonic limb, maxilla and mandible ; whole brain ; Pooled - Molar ; visual cortex ; whole embryo including extraembryonic tissues at 10.5-days postcoitum ; whole embryo including extraembryonic tissues at 11.5-days…	8	256		GO: molecular function|receptor activity|IEA|GO:0004872|MGI|na GO: molecular function|signal transducer activity|IDA|GO:0004871|MGI|11940581 GO: biological process|activation of MAPK|IDA|GO:0000187|MGI|11940581 GO: biological process|signal transduction|IDA|GO:0007165|MGI|11940581
AJ555877	1.831	0.00465	P	Mus musculus mRNA for adenosine A1 receptor (ADORA1 gene).	Mm.298908	Mus musculus mRNA for adenosine A1 receptor (ADORA1 gene).		adenosine A1 receptor	Adora1	1 E4	11539	visual cortex ; whole joints ; brain ; mammary gland ; stomach ; olfactory brain ; hippocampus ; liver ; Newborn Kidney ; whole body ; medulla oblongata ; placenta ; diencephalon ; hypothalamus ; aorta and vein ; cortex ; corpora quadrigemina ; Whole brain ; corpus striatum ; cerebellum ; heart ; salivary gland ; tumor, gross tissue ; kidney ; ovary ; Newborn Heart ; Trophoblast stem cell ; olfac…	1	174		GO: molecular function|G-protein coupled receptor activity|IEA|GO:0004930|MGI|na GO: molecular function|receptor activity|IEA|GO:0004872|MGI|na GO: biological process|G-protein coupled receptor protein signaling pathway|IEA|GO:0007186|MGI|na GO: cellular component|integral to membrane|TAS|GO:0016021|MGI|12466851 GO: molecular function|adenosine receptor activity, G-protein coupled|ISS|GO:0001609|…
AK018592	1.96	0.00232	P	similar to TNF RECEPTOR TYPE 1	Mm.264255	similar to TNF RECEPTOR TYPE 1		TNFRSF1A-associated via death domain	Tradd		71609	activated spleen ; liver ; placenta ; mammary gland ; pooled organs ; whole body ; germinal B-cell from resting spleen ; thymus ; head ; spinal ganglion ; oviduct ; branchial arches ; pooled lung tumors ; Thymus ; blastocyst ; urinary bladder ; small intestine ; cecum ; whole joints ; submandibular gland ; mullerian duct includes surrounding region ; subfornical organ and postrema	8	73		GO: biological process|apoptosis|ISS|GO:0006915|MGI|12466851,12819136 GO: biological process|regulation of apoptosis|ISS|GO:0042981|MGI|12819136
BC003298	1.931	0.00333	P	paxillin, mRNA (cDNA clone IMAGE:3583842), partial	Mm.18714	paxillin, mRNA (cDNA clone IMAGE:3583842), partial		paxillin	Pxn		19303	inner ear ; activated spleen ; whole joints ; bone marrow ; lung ; whole body ; mammary gland ; whole brain ; stomach ; amnion ; visual cortex ; E6.5 whole embryo ; uterus ; E9.5 whole embryo ; lung and heart ; Organ of Corti/Ear ; pancreas ; kidney ; embryo ; pooled organs ; fetus ; macrophage ; Thymus ; tumor, gross tissue ; placenta ; RPE/choroid ; head ; Upper Head ; epididymis ; bowel ; embr…	5	514		GO: molecular function|protein binding|IPI|GO:0005515|MGI|11825902,12695331,14580336,14636584 GO: biological process|activation of MAPK|IDA|GO:0000187|MGI|14636584 GO: biological process|integrin-mediated signaling pathway|IMP|GO:0007229|MGI|11784865,11825902 GO: biological process|cytoskeleton organization and biogenesis|IMP|GO:0007010|MGI|11784865 GO: biological process|cell-matrix adhesion|ISS…
BC005656	2.589	0.00807	P	regulator of G-protein signaling 5, mRNA (cDNA clone IMAGE:3710250)	Mm.20954	regulator of G-protein signaling 5, mRNA (cDNA clone IMAGE:3710250)		regulator of G-protein signaling 5	Rgs5		19737	mammary gland ; heart ; Whole brain ; RPE/choroid ; Pooled thyroids from 5 mice ; whole embryo including extraembryonic tissues at 10.5-days postcoitum ; Thymus ; Pooled - Molar ; Spleen ; pancreas ; embryonic limb, maxilla and mandible ; whole body ; bowel ; urogenital ridge (embryonic) ; small intestine ; head ; ovary and uterus ; olfactory brain ; tumor, gross tissue ; lymph node ; activated s…	1	240		GO: molecular function|GTPase activator activity|TAS|GO:0005096|MGI|11342430 GO: molecular function|signal transducer activity|IEA|GO:0004871|MGI|na GO: biological process|G-protein coupled receptor protein signaling pathway|TAS|GO:0007186|MGI|11342430 GO: biological process|signal transduction|IEA|GO:0007165|MGI|na
BC006626	2.733	0.0189	P	protein phosphatase 2A, regulatory subunit B (PR 53)	Mm.275393	protein phosphatase 2A, regulatory subunit B (PR 53)		protein phosphatase 2A, regulatory subunit B (PR 53)	Ppp2r4	2 B	110854	visual cortex ; whole body ; kidney ; Embryonic Stem Cell ; whole embryo including extraembryonic tissues at 11.5-days postcoitum ; embryo ; heart ; liver ; testis ; Thymus ; blastocyst ; tumor, biopsy sample ; whole embryo including extraembryonic tissues at 13.5-days postcoitum ; whole skin ; lymph node ; pooled organs ; Liver ; Osteoblast ; Spleen ; bone marrow ; skin ; thymus ; uterus ; stoma…	2	591	NULL	NULL
BC030859	1.87	0.0182	P,A	Mus musculus cyclin G associated kinase, mRNA	Mm.276647	Mus musculus cyclin G associated kinase, mRNA		cyclin G associated kinase	Gak	5 F	231580	visual cortex ; blastocyst ; head ; placenta ; uterus ; Tcell ; skin ; thymus ; cerebellum ; whole skin ; testis ; urinary bladder ; bone ; vagina ; Mesenchymal stem cell ; hypothalamus ; spinal cord ; aorta and vein ; cortex ; parthenogenote ; corpora quadrigemina ; embryo ; whole embryo including extraembryonic tissues at 11.5-days postcoitum ; tumor, gross tissue ; whole brain ; E9.5 whole emb…	5	479		GO: molecular function|ATP binding|IEA|GO:0005524|MGI|na GO: molecular function|protein serine/threonine kinase activity|IEA|GO:0004674|MGI|na GO: molecular function|protein kinase activity|IEA|GO:0004672|MGI|na GO: biological process|cell cycle|IEA|GO:0007049|MGI|na GO: biological process|protein amino acid phosphorylation|IEA|GO:0006468|MGI|na GO: cellular component|endoplasmic reticulum|IEA|GO…
D01034	1.901	0.000797	P	Mus musculus mRNA for TFIID, complete cds.	Mm.244820	transcription initation factor TF2D;TATA-BOX factor;TATA sequence-binding protein(TBP)		TATA box binding protein	Tbp		21374	Thymus ; Unfertilized Egg ; Trophoblast stem cell ; Upper Head ; E6.5 whole embryo ; lymph node ; embryo ; fetus ; testis ; Tcell ; 4-cell stage embryo ; primary cultures of Sertoli cells ; brain ; bone ; medulla oblongata ; visual cortex ; mammary gland ; placenta ; whole eye ; Embryonic Stem Cell ; lung ; E9.5 whole embryo ; eye ; whole body ; cecum ; diencephalon ; cerebellum ; hypothalamus ; …	17	160		GO: molecular function|protein binding|IPI|GO:0005515|MGI|9050847 GO: molecular function|RNA polymerase II transcription factor activity|IEA|GO:0003702|MGI|na GO: molecular function|DNA binding|IEA|GO:0003677|MGI|na GO: molecular function|transcription factor activity|TAS|GO:0003700|MGI|11861477 GO: biological process|transcription initiation from Pol II promoter|IEA|GO:0006367|MGI|na GO: biologi…
D10028	3.816	0.0172	P,A	GLUTAMATE (NMDA)RECEPTOR SUBNIT ZATA 1 PRECURSOR (NR1)(MND-R1)(N-METHYL-D-ASPARTATE RECEPTOR)	Mm.278672	GLUTAMATE (NMDA)RECEPTOR SUBNIT ZATA 1 PRECURSOR (NR1)(MND-R1)(N-METHYL-D-ASPARTATE RECEPTOR)		glutamate receptor, ionotropic, NMDA1 (zeta 1)	Grin1		14810	whole brain ; visual cortex ; cerebellum ; embryo ; inner ear ; 4-cell stage embryo ; hypothalamus ; brain ; retina ; Whole brain ; skin ; eyeball	2	66		GO: molecular function|glutamate-gated ion channel activity|IEA|GO:0005234|MGI|na GO: molecular function|ion channel activity|IEA|GO:0005216|MGI|na GO: molecular function|potassium channel activity|ISS|GO:0005267|MGI|12466851 GO: molecular function|protein binding|IPI|GO:0005515|MGI|11754835 GO: molecular function|transporter activity|IEA|GO:0005215|MGI|na GO: molecular function|receptor binding|…
D28492	2.541	2.56e-05	P	caspase-2 precursor(CASP2);NEDD protein;ICH-1 protease	Mm.3921	caspase-2 precursor(CASP2);NEDD protein;ICH-1 protease		caspase 2	Casp2		12366	lung ; inner ear ; thymus ; mammary gland ; kidney ; activated spleen ; whole embryo including extraembryonic tissues at 10.5-days postcoitum ; heart ; embryo ; Thymus ; lymph node ; whole skin ; macrophage ; brain ; fetus ; tongue ; skin ; head ; embryonic limb, maxilla and mandible ; tumor, biopsy sample ; infiltrating ductal carcinoma ; tumor, gross tissue ; Tcell ; placenta ; blood ; testis ;…	6	412		GO: molecular function|cysteine-type peptidase activity|IEA|GO:0008234|MGI|na GO: molecular function|protein binding|IPI|GO:0005515|MGI|12477715 GO: biological process|induction of apoptosis|IDA|GO:0006917|MGI|8087842,12477715,12819136 GO: biological process|proteolysis and peptidolysis|ISS|GO:0006508|MGI|12819136 GO: biological process|apoptosis|IEA|GO:0006915|MGI|na GO: cellular component|intra…
L21973	3.257	0.0163	P,A	TRANSCRIPTION FACTOR E2F1(E2F-1)	Mm.18036	TRANSCRIPTION FACTOR E2F1(E2F-1)		E2F transcription factor 1	E2f1		13555	visual cortex ; thymus ; pituitary gland ; placenta ; 4-cell stage embryo ; carcinoma ; lymph node ; mammary gland ; blastocyst ; skin ; ovary and uterus ; adipose ; in vitro fertilized eggs ; bone marrow ; embryonic body between diaphragm region and neck ; cerebellum ; corpora quadrigemina ; hippocampus ; pancreas ; eyeball ; embryo ; infiltrating ductal carcinoma ; egg ; branchial arches ; whol…	2	101		GO: molecular function|protein binding|IPI|GO:0005515|MGI|14593116 GO: molecular function|DNA binding|IEA|GO:0003677|MGI|na GO: molecular function|transcription factor activity|IDA|GO:0003700|MGI|10779331,11095619 GO: biological process|cell cycle|IEA|GO:0007049|MGI|na GO: biological process|regulation of transcription, DNA-dependent|IDA|GO:0006355|MGI|14593116 GO: biological process|apoptosis|ID…
L35049	1.954	0.00143	P	bcl-x;BCL2L1	Mm.238213	bcl-x;BCL2L1		Bcl2-like 1	Bcl2l1		12048	visual cortex ; mammary gland ; kidney ; sympathetic ganglion ; liver ; whole body ; bone marrow ; 6-day primitive type A spermatogonia ; whole eye ; 18-day preleptotene spermatocytes ; placenta ; Hematopoietic Stem Cell (Lin-/c-Kit+/Sca-1-) ; RPE/choroid ; whole embryo including extraembryonic tissues at 11.5-days postcoitum ; embryo ; heart ; fetus ; infiltrating ductal carcinoma ; aorta and ve…	2	303		GO: molecular function|protein binding|IPI|GO:0005515|MGI|11463391,11717309,12115603 GO: biological process|anti-apoptosis|IDA|GO:0006916|MGI|11717309 GO: biological process|apoptosis|IDA|GO:0006915|MGI|12115603 GO: cellular component|membrane|IEA|GO:0016020|MGI|na GO: cellular component|mitochondrion|IEA|GO:0005739|MGI|na GO: cellular component|integral to membrane|IEA|GO:0016021|MGI|na
L37296	1.807	0.00263	P	BAD protein mRNA	Mm.4387	BAD protein mRNA		Bcl-associated death promoter	Bad	19 A	12015	mammary gland ; whole body ; visual cortex ; Rathke's pouches ; whole joints ; thymus ; primary cultures of Sertoli cells ; embryonic limb, maxilla and mandible ; small intestinal epithelial progenitors ; Gastric Epithelial Progenitor ; Organ of Corti/Ear ; placenta ; Pooled thyroids from 5 mice ; Testicles ; Whole eye ; embryo ; bone marrow ; stomach ; Liver ; heart ; liver ; testis ; pancreas ;…	19	196		GO: molecular function|protein binding|IPI|GO:0005515|MGI|11717309,12115603 GO: biological process|induction of apoptosis|IDA|GO:0006917|MGI|11717309 GO: biological process|apoptosis|IDA|GO:0006915|MGI|12115603
M14639	1.875	0.0114	P	interleukin-1 mRNA	Mm.15534	interleukin-1 mRNA		interleukin 1 alpha	Il1a		16175	activated spleen ; bone marrow ; mammary gland ; tumor, biopsy sample	2	25		GO: molecular function|interleukin-1 receptor binding|IEA|GO:0005149|MGI|na GO: molecular function|cytokine activity|IEA|GO:0005125|MGI|na GO: molecular function|growth factor activity|IEA|GO:0008083|MGI|na GO: biological process|immune response|IEA|GO:0006955|MGI|na GO: biological process|cell proliferation|IEA|GO:0008283|MGI|na GO: biological process|regulation of cell cycle|IEA|GO:0000074|MGI|…
M20473	2.005	0.00695	P	Camp-dependent protein kinase type 1-beta regulatory chain	Mm.306163	Camp-dependent protein kinase type 1-beta regulatory chain		protein kinase, cAMP dependent regulatory, type I beta	Prkar1b		19085	visual cortex ; diencephalon ; brain ; testis ; hypothalamus ; spontaneous tumor, metastatic to mammary. Stem cell origin. ; skin ; spinal cord ; spinal ganglion ; ovary ; whole body ; neural retina ; Trophoblast stem cell ; hippocampus ; pancreas ; whole brain ; subfornical organ and postrema ; Brain ; cortex ; cerebellum ; embryo ; whole embryo including extraembryonic tissues at 13.5-days post…	5	357		GO: molecular function|cAMP-dependent protein kinase regulator activity|ISS|GO:0008603|MGI|3375237,8032683 GO: biological process|learning and/or memory|IMP|GO:0007611|MGI|7568030 GO: biological process|protein amino acid phosphorylation|TAS|GO:0006468|MGI|7775586 GO: biological process|cell proliferation|TAS|GO:0008283|MGI|7775586 GO: biological process|signal transduction|IEA|GO:0007165|MGI|na …
M60909	3.217	0.00174	A	Mouse retinoic acid receptor alpha' Mrna	Mm.103336	Mouse retinoic acid receptor alpha' Mrna		retinoic acid receptor, alpha	Rara		19401	stomach ; mammary gland ; skin ; embryonic body between diaphragm region and neck ; lymph node ; urinary bladder ; thymus ; embryo ; whole eye ; placenta ; pancreas ; activated spleen ; inner ear ; kidney ; head ; infiltrating ductal carcinoma ; tumor, gross tissue ; retina ; Rathke's pouches ; colon ; Thymus ; liver ; Total pancreas ; spleen ; amnion ; whole brain ; Organ of Corti ; undifferenti…	11	132		GO: molecular function|retinoic acid receptor activity|ISS|GO:0003708|MGI|12466851 GO: molecular function|steroid hormone receptor activity|IEA|GO:0003707|MGI|na GO: molecular function|ligand-dependent nuclear receptor activity|IEA|GO:0004879|MGI|na GO: molecular function|DNA binding|IEA|GO:0003677|MGI|na GO: molecular function|receptor activity|IEA|GO:0004872|MGI|na GO: molecular function|transc…
NM_007407	2.731	0.0183	P,A	adenylate cyclase activating polypeptide 1 receptor 1	Mm.44245	adenylate cyclase activating polypeptide 1 receptor 1		adenylate cyclase activating polypeptide 1 receptor 1	Adcyap1r1	6 B3	11517	whole brain ; Whole brain ; whole skin ; diencephalon ; fetus ; hypothalamus ; thymus ; cerebellum ; diaphragm ; visual cortex ; Upper Head ; mammary gland ; hippocampus ; brain ; subfornical organ and postrema ; head ; Brain	6	128		GO: molecular function|vasoactive intestinal polypeptide receptor activity|TAS|GO:0004999|MGI|9729410 GO: molecular function|G-protein coupled receptor activity|TAS|GO:0004930|MGI|9729410 GO: biological process|G-protein coupled receptor protein signaling pathway|TAS|GO:0007186|MGI|9729410 GO: biological process|spermatogenesis|IEA|GO:0007283|MGI|na GO: cellular component|membrane|IEA|GO:0016020|…
NM_007522	1.92	0.00758	P,A	Mus musculus Bcl-associated death promoter (Bad), mRNA.	Mm.4387	Mus musculus Bcl-associated death promoter (Bad), mRNA.		Bcl-associated death promoter	Bad	19 A	12015	mammary gland ; whole body ; visual cortex ; Rathke's pouches ; whole joints ; thymus ; primary cultures of Sertoli cells ; embryonic limb, maxilla and mandible ; small intestinal epithelial progenitors ; Gastric Epithelial Progenitor ; Organ of Corti/Ear ; placenta ; Pooled thyroids from 5 mice ; Testicles ; Whole eye ; embryo ; bone marrow ; stomach ; Liver ; heart ; liver ; testis ; pancreas ;…	19	196		GO: molecular function|protein binding|IPI|GO:0005515|MGI|11717309,12115603 GO: biological process|induction of apoptosis|IDA|GO:0006917|MGI|11717309 GO: biological process|apoptosis|IDA|GO:0006915|MGI|12115603
NM_007595	2.256	0.000976	P	Mus musculus calcium/calmodulin-dependent protein kinase II, beta	Mm.4857	Mus musculus calcium/calmodulin-dependent protein kinase II, beta		calcium/calmodulin-dependent protein kinase II, beta	Camk2b		12323	visual cortex ; whole brain ; retina ; brain - normal mediobasal hypothalamus ; brain ; cerebellum ; Whole brain ; pituitary gland ; pancreas ; embryonic limb, maxilla and mandible ; olfactory brain ; hypothalamus ; corpus striatum ; hippocampus ; head ; corpora quadrigemina ; eyeball ; colon ; Brain ; E6.5 whole embryo ; type B spermatogonia, pooled from multiple mice ; neural retina	11	150		GO: molecular function|calcium/calmodulin-dependent protein kinase activity|IEA|GO:0004685|MGI|na GO: molecular function|protein-tyrosine kinase activity|ISS|GO:0004713|MGI|12466851 GO: molecular function|ATP binding|IEA|GO:0005524|MGI|na GO: molecular function|protein serine/threonine kinase activity|IMP|GO:0004674|MGI|12660151 GO: molecular function|calmodulin binding|IEA|GO:0005516|MGI|na GO: …
NM_008137	2.635	0.000772	A	Mus musculus guanine nucleotide binding protein, alpha 14 (Gna14),	Mm.313181	Mus musculus guanine nucleotide binding protein, alpha 14 (Gna14),		guanine nucleotide binding protein, alpha 14	Gna14		14675	tumor, biopsy sample ; stomach ; colon ; inner ear ; bone marrow ; primary cultures of Sertoli cells ; pancreas ; head ; testis ; whole embryo including extraembryonic tissues at 11.5-days postcoitum ; urinary bladder ; colon epithelia progenitor cells ; kidney ; in vitro fertilized eggs ; placenta ; heart ; ovary ; tumor, metastatic to mammary ; Organ of Corti	19	66		GO: molecular function|GTP binding|IEA|GO:0005525|MGI|na GO: molecular function|signal transducer activity|IEA|GO:0004871|MGI|na GO: biological process|protein amino acid ADP-ribosylation|ISS|GO:0006471|MGI|12466851 GO: biological process|G-protein coupled receptor protein signaling pathway|ISS|GO:0007186|MGI|2508088 GO: biological process|signal transduction|IEA|GO:0007165|MGI|na GO: molecular f…
NM_008228	2.258	0.0224	P,A	Mus musculus histone deacetylase 1 (Hdac1), mRNA.	Mm.311914	Mus musculus histone deacetylase 1 (Hdac1), mRNA.		histone deacetylase 1	Hdac1		15181	bone marrow ; visual cortex ; Rathke's pouches ; 6-day primitive type A spermatogonia ; eye ; pancreas ; Blastocyst ; whole joints ; Laser-captured isthmal cells from tox176 transgenic mice ; Embryonic Stem Cell ; embryo ; fetus ; lung ; Thymus ; tumor, gross tissue ; Liver ; craniofacial tissues ; heart ; infiltrating ductal carcinoma ; mammary gland ; testis ; kidney ; bone (pooled) ; round spe…	4	98		GO: molecular function|histone deacetylase activity|IEA|GO:0004407|MGI|na GO: molecular function|protein binding|IPI|GO:0005515|MGI|12529400,12900441 GO: biological process|regulation of transcription, DNA-dependent|IEA|GO:0006355|MGI|na GO: cellular component|nucleus|IEA|GO:0005634|MGI|na GO: biological process|chromatin modification|IEA|GO:0016568|MGI|na GO: molecular function|hydrolase activit…
NM_008610	1.828	0.0196	P	Mus musculus matrix metalloproteinase 2 (Mmp2), mRNA.	Mm.29564	Mus musculus matrix metalloproteinase 2 (Mmp2), mRNA.		matrix metalloproteinase 2	Mmp2		17390	embryo ; tumor, biopsy sample ; fetus ; kidney ; whole joints ; Whole brain ; Thymus ; skin ; heart ; whole skin ; embryonic body between diaphragm region and neck ; infiltrating ductal carcinoma ; bone ; vagina ; thymus ; cerebellum ; spontaneous tumor, metastatic to mammary. Stem cell origin. ; tumor, gross tissue ; whole embryo including extraembryonic tissues at 10.5-days postcoitum ; Embryon…	8	373		GO: molecular function|gelatinase A activity|IEA|GO:0004228|MGI|na GO: molecular function|metallopeptidase activity|IEA|GO:0008237|MGI|na GO: molecular function|zinc ion binding|IEA|GO:0008270|MGI|na GO: molecular function|metalloendopeptidase activity|IEA|GO:0004222|MGI|na GO: molecular function|calcium ion binding|IEA|GO:0005509|MGI|na GO: biological process|proteolysis and peptidolysis|IEA|GO:…
NM_008894	2.712	7.21e-05	P	Mus musculus polymerase (DNA directed), delta 2, regulatory subunit	Mm.35788	Mus musculus polymerase (DNA directed), delta 2, regulatory subunit		polymerase (DNA directed), delta 2, regulatory subunit	Pold2	11 A2	18972	Testicles ; embryo ; mammary gland ; eye ; E6.5 whole embryo ; fetus ; heart ; liver ; whole body ; whole skin ; testis ; optic vesicle and lens placode ; tumor, biopsy sample ; Liver ; placenta ; lymph node ; olfactory brain ; medulla oblongata ; infiltrating ductal carcinoma ; corpora quadrigemina ; tumor, gross tissue ; bone marrow ; Rathke's pouches ; head ; Spleen ; spontaneous tumor, metast…	11	185		GO: molecular function|DNA-directed DNA polymerase activity|IEA|GO:0003887|MGI|na GO: biological process|DNA replication|IEA|GO:0006260|MGI|na GO: cellular component|nucleus|IEA|GO:0005634|MGI|na GO: molecular function|transferase activity|IEA|GO:0016740|MGI|na
NM_009271	2.285	0.00538	A	Rous sarcoma oncogene (Src), mRNA	Mm.22845	Rous sarcoma oncogene (Src), mRNA		Rous sarcoma oncogene	Src		20779	cerebellum ; cortex ; tumor, gross tissue ; whole eye ; whole brain ; colon ; oviduct ; salivary gland ; tumor, metastatic to mammary ; tumor, biopsy sample ; spontaneous tumor, metastatic to mammary. Stem cell origin. ; infiltrating ductal carcinoma ; Oviduct ; mammary gland ; embryo ; whole embryo including extraembryonic tissues at 11.5-days postcoitum ; pituitary gland ; placenta ; inner ear …	2	104		GO: molecular function|protein-tyrosine kinase activity|IMP|GO:0004713|MGI|14636584 GO: molecular function|ATP binding|IEA|GO:0005524|MGI|na GO: molecular function|protein serine/threonine kinase activity|ISS|GO:0004674|MGI|12466851 GO: molecular function|protein binding|IPI|GO:0005515|MGI|11274221,11826110 GO: molecular function|protein kinase activity|IDA|GO:0004672|MGI|11274221 GO: biological …
NM_009409	1.945	0.0172	P	Mus musculus topoisomerase (DNA) II beta (Top2b), mRNA.	Mm.130362	Mus musculus topoisomerase (DNA) II beta (Top2b), mRNA.		topoisomerase (DNA) II beta	Top2b	14 A1	21974	Upper Head ; whole brain ; mammary gland ; whole eye ; whole embryo including extraembryonic tissues at 11.5-days postcoitum ; Spleen ; retina ; whole body ; Hematopoietic Stem Cell (Lin-/c-Kit-/Sca-1-) ; kidney ; Laser-captured isthmal cells from tox176 transgenic mice ; fetus ; heart ; head ; Pooled thyroids from 5 mice ; brain ; whole embryo including extraembryonic tissues at 10.5-days postco…	14	417		GO: molecular function|DNA topoisomerase (ATP-hydrolyzing) activity|IEA|GO:0003918|MGI|na GO: molecular function|DNA topoisomerase activity|IEA|GO:0003916|MGI|na GO: molecular function|ATP binding|IEA|GO:0005524|MGI|na GO: molecular function|DNA binding|IEA|GO:0003677|MGI|na GO: biological process|axonogenesis|IMP|GO:0007409|MGI|10615047 GO: biological process|DNA metabolism|IEA|GO:0006259|MGI|na…
NM_009506	1.83	0.028	P	Mus musculus vascular endothelial growth factor C (Vegfc), mRNA.	Mm.1402	Mus musculus vascular endothelial growth factor C (Vegfc), mRNA.		vascular endothelial growth factor C	Vegfc	8 B3	22341	tumor, biopsy sample ; RPE/choroid ; Tcell ; tongue ; pituitary gland ; embryonic body between diaphragm region and neck ; diencephalon ; aorta and vein ; cerebellum ; infiltrating ductal carcinoma ; mammary gland ; tumor, metastatic to mammary ; spontaneous tumor, metastatic to mammary. Stem cell origin. ; head ; spleen ; undifferentiated limb	8	32		GO: molecular function|growth factor activity|IEA|GO:0008083|MGI|na GO: biological process|cell growth and/or maintenance|IEA|GO:0008151|MGI|na GO: biological process|cell proliferation|IEA|GO:0008283|MGI|na GO: biological process|regulation of cell cycle|IEA|GO:0000074|MGI|na GO: cellular component|membrane|IEA|GO:0016020|MGI|na GO: cellular component|extracellular space|TAS|GO:0005615|MGI|12466…
NM_009793	1.713	0.0015	P	Mus musculus calcium/calmodulin-dependent protein kinase IV	Mm.158291	Mus musculus calcium/calmodulin-dependent protein kinase IV		calcium/calmodulin-dependent protein kinase IV	Camk4		12326	thymus ; visual cortex ; testis ; Thymus ; cerebellum ; Tcell ; Upper Head ; Whole eye ; Newborn Kidney ; whole brain ; lymph node ; Whole brain ; olfactory brain ; cortex ; hypothalamus ; brain ; Spleen ; spontaneous tumor, metastatic to mammary. Stem cell origin. ; corpora quadrigemina ; retina	18	122		GO: molecular function|calmodulin regulated protein kinase activity|TAS|GO:0004683|MGI|10964952 GO: molecular function|calcium/calmodulin-dependent protein kinase activity|IEA|GO:0004685|MGI|na GO: molecular function|ATP binding|IEA|GO:0005524|MGI|na GO: molecular function|protein serine/threonine kinase activity|IEA|GO:0004674|MGI|na GO: molecular function|calmodulin binding|IEA|GO:0005516|MGI|n…
NM_013684	1.999	0.00686	P	TATA box binding protein (Tbp), mRNA	Mm.244820	TATA box binding protein (Tbp), mRNA		TATA box binding protein	Tbp		21374	Thymus ; Unfertilized Egg ; Trophoblast stem cell ; Upper Head ; E6.5 whole embryo ; lymph node ; embryo ; fetus ; testis ; Tcell ; 4-cell stage embryo ; primary cultures of Sertoli cells ; brain ; bone ; medulla oblongata ; visual cortex ; mammary gland ; placenta ; whole eye ; Embryonic Stem Cell ; lung ; E9.5 whole embryo ; eye ; whole body ; cecum ; diencephalon ; cerebellum ; hypothalamus ; …	17	160		GO: molecular function|protein binding|IPI|GO:0005515|MGI|9050847 GO: molecular function|RNA polymerase II transcription factor activity|IEA|GO:0003702|MGI|na GO: molecular function|DNA binding|IEA|GO:0003677|MGI|na GO: molecular function|transcription factor activity|TAS|GO:0003700|MGI|11861477 GO: biological process|transcription initiation from Pol II promoter|IEA|GO:0006367|MGI|na GO: biologi…
NM_015812	2.838	0.000153	P	regulator of G-protein signaling 6 (Rgs6), mRNA	Mm.153013	regulator of G-protein signaling 6 (Rgs6), mRNA		regulator of G-protein signaling 6	Rgs6		50779	visual cortex ; corpora quadrigemina ; cortex ; kidney ; lung ; head ; hypothalamus ; retina ; Testicles	12	39		GO: molecular function|GTPase activator activity|TAS|GO:0005096|MGI|11342430 GO: molecular function|signal transducer activity|IEA|GO:0004871|MGI|na GO: biological process|G-protein coupled receptor protein signaling pathway|TAS|GO:0007186|MGI|11342430 GO: biological process|intracellular signaling cascade|IEA|GO:0007242|MGI|na GO: biological process|signal transduction|IEA|GO:0007165|MGI|na GO: …
NM_019414	1.937	0.0164	P	Mus musculus selenium binding protein 2 (Selenbp2), mRNA.	Mm.225405	Mus musculus selenium binding protein 2 (Selenbp2), mRNA.		selenium binding protein 2	Selenbp2		20342	liver ; kidney ; Liver ; spleen ; tumor, biopsy sample ; diaphragm ; small intestnal epithelial progenitor cells ; liver tumor ; amnion	3	66	NULL	NULL
NM_021374	1.824	0.0318	P	regulator of G-protein signaling 20 (Rgs20), mRNA	Mm.103771	regulator of G-protein signaling 20 (Rgs20), mRNA		regulator of G-protein signaling 20	Rgs20	1 A2	58175	visual cortex ; olfactory brain ; brain ; diencephalon ; cerebellum ; tumor, metastatic to mammary ; spontaneous tumor, metastatic to mammary. Stem cell origin. ; tumor, gross tissue ; retina ; embryonic limb, maxilla and mandible ; hippocampus ; corpus striatum ; olfactory epithelium ; Brain ; subfornical organ and postrema	1	43		GO: molecular function|GTPase activator activity|TAS|GO:0005096|MGI|11342430 GO: molecular function|signal transducer activity|IEA|GO:0004871|MGI|na GO: biological process|G-protein coupled receptor protein signaling pathway|TAS|GO:0007186|MGI|11342430 GO: biological process|signal transduction|IEA|GO:0007165|MGI|na GO: cellular component|membrane|IEA|GO:0016020|MGI|na GO: cellular component|Golg…
NM_023057	3.07	4.65e-06	A	sterile-alpha motif and leucine zipper containing	Mm.314618	sterile-alpha motif and leucine zipper containing		expressed sequence AV006891	AV006891	2 C3	65964	Hematopoietic Stem Cell (Lin-/c-Kit-/Sca-1-) ; whole body ; mammary gland ; whole brain ; Whole brain ; Upper Head ; Embryonic Stem Cell ; diaphragm ; pituitary ; head ; skin ; germinal B-cell ; hypothalamus ; corpora quadrigemina ; heart ; lung ; tumor, biopsy sample ; ovary ; urinary bladder ; Thymus ; Spleen ; tumor, gross tissue ; infiltrating ductal carcinoma ; Trophoblast stem cell ; neural…	2	81		GO: molecular function|MAP kinase kinase kinase activity|IDA|GO:0004709|MGI|11042189 GO: molecular function|ATP binding|IEA|GO:0005524|MGI|na GO: molecular function|protein serine/threonine kinase activity|IEA|GO:0004674|MGI|na GO: biological process|cytoskeleton organization and biogenesis|IDA|GO:0007010|MGI|11042189 GO: cellular component|cytoplasm|IDA|GO:0005737|MGI|11042189 GO: cellular compo…
NM_023709	1.752	0.00994	P,A	Mus musculus calpain 9 (nCL-4) (Capn9), mRNA.	Mm.6209	Mus musculus calpain 9 (nCL-4) (Capn9), mRNA.		calpain 9 (nCL-4)	Capn9	8 E2	73647	intestinal mucosa ; whole skin ; testis ; colon ; stomach	8	14		GO: molecular function|calpain activity|ISS|GO:0004198|MGI|12466851 GO: molecular function|cysteine-type peptidase activity|IEA|GO:0008234|MGI|na GO: molecular function|cysteine-type endopeptidase activity|ISS|GO:0004197|MGI|12466851 GO: molecular function|calcium ion binding|ISS|GO:0005509|MGI|12466851 GO: biological process|proteolysis and peptidolysis|ISS|GO:0006508|MGI|12466851 GO: cellular c…
NM_029239	1.707	0.00764	P	protein kinase C, nu (Prkcn), mRNA.	Mm.252776	protein kinase C, nu (Prkcn), mRNA.		protein kinase C, nu	Prkcn	17 E3	75292	Hematopoietic Stem Cell (Lin-/c-Kit+/Sca-1+) ; Upper Head ; whole embryo including extraembryonic tissues at 8.5-days postcoitum ; whole body ; liver ; mammary gland ; heart ; kidney ; lymph node ; embryo ; pooled organs ; uterus ; head ; testis ; skin ; embryonic body between diaphragm region and neck ; adrenal gland ; bone ; hypothalamus ; thymus ; cerebellum ; lung ; spinal ganglion ; eyeball …	17	333		GO: molecular function|ATP binding|IEA|GO:0005524|MGI|na GO: molecular function|kinase activity|IEA|GO:0016301|MGI|na GO: molecular function|transferase activity|IEA|GO:0016740|MGI|na
NM_138305	2.381	0.000164	P	adenylate cyclase 3 (Adcy3)	Mm.71996	adenylate cyclase 3 (Adcy3)		adenylate cyclase 3	Adcy3	12 A-B	104111	whole brain ; adipose ; brain ; spermatocytes, pooled from multiple mice ; 6-day primitive type A spermatogonia ; Whole brain ; whole eye ; olfactory mucosa ; Newborn Kidney ; Upper Head ; whole embryo including extraembryonic tissues at 13.5-days postcoitum ; whole embryo including extraembryonic tissues at 10.5-days postcoitum ; embryo ; mammary gland ; head ; liver ; thymus ; aorta and vein ; …	12	62		GO: molecular function|calcium/calmodulin-responsive adenylate cyclase activity|ISS|GO:0008294|MGI|12466851 GO: molecular function|adenylate cyclase activity|TAS|GO:0004016|MGI|7766992,12466851 GO: molecular function|guanylate cyclase activity|ISS|GO:0004383|MGI|12466851 GO: molecular function|protein binding|IPI|GO:0005515|MGI|12122055 GO: molecular function|calmodulin binding|IEA|GO:0005516|MGI…
NM_175770	1.883	0.0109	P	TAF7 RNA polymerase II, TATA box binding protein	Mm.236009	TAF7 RNA polymerase II, TATA box binding protein		TAF7 RNA polymerase II, TATA box binding protein (TBP)-associated factor	Taf7	18 B3	24074	thymus ; bone marrow ; placenta ; Upper Head ; Embryonic Stem Cell ; 8-cell stage embryo ; 4-cell stage embryo ; embryo ; visual cortex ; epididymis ; skin ; blastocyst ; forelimb ; testis ; diaphragm ; in vitro fertilized eggs ; mammary gland ; oviduct ; embryonic body between diaphragm region and neck ; Spleen ; Pituitary gland ; whole embryo ; retina ; tumor, biopsy sample ; Undifferentiated E…	18	121		GO: molecular function|RNA polymerase II transcription factor activity|IDA|GO:0003702|MGI|10438527 GO: biological process|regulation of transcription, DNA-dependent|IEA|GO:0006355|MGI|na GO: biological process|transcription from Pol II promoter|IDA|GO:0006366|MGI|10438527 GO: cellular component|transcription factor TFIID complex|IDA|GO:0005669|MGI|10438527 GO: cellular component|nucleus|IEA|GO:00…
NM_176933	3.956	0.0234	P,A	dual specificity phosphatase 4 (Dusp4), mRNA	Mm.170276	dual specificity phosphatase 4 (Dusp4), mRNA		dual specificity phosphatase 4	Dusp4	8 A3	319520	whole brain ; tumor, gross tissue ; Whole brain ; whole eye ; placenta ; RPE/choroid ; retina ; E6.5 whole embryo ; Embryonic Stem Cell ; whole embryo including extraembryonic tissues at 10.5-days postcoitum ; whole embryo including extraembryonic tissues at 11.5-days postcoitum ; embryo ; inner ear ; mammary gland ; kidney ; fetus ; whole skin ; infiltrating ductal carcinoma ; lung ; primary cul…	8	149		GO: molecular function|protein tyrosine/serine/threonine phosphatase activity|ISS|GO:0008138|MGI|12466851 GO: molecular function|protein serine/threonine phosphatase activity|ISS|GO:0004722|MGI|12466851 GO: molecular function|protein phosphatase type 1 activity|ISS|GO:0000163|MGI|12466851 GO: molecular function|protein phosphatase type 2C activity|ISS|GO:0015071|MGI|12466851 GO: molecular functio…
u39391	3.257	0.000682	A	5-hydroxytryptamine 1A receptor(5HT-1A);serotonin receptor	Mm.4716	5-hydroxytryptamine 1A receptor(5HT-1A);serotonin receptor		5-hydroxytryptamine (serotonin) receptor 1A	Htr1a		15550	visual cortex ; corpora quadrigemina ; cortex ; diencephalon ; head ; hippocampus ; hypothalamus ; brain ; olfactory brain ; subfornical organ and postrema ; otocysts	13	49		GO: molecular function|neuropeptide Y receptor activity|ISS|GO:0004983|MGI|12466851 GO: molecular function|serotonin receptor activity|ISS|GO:0004993|MGI|12466851 GO: molecular function|G-protein coupled receptor activity|IEA|GO:0004930|MGI|na GO: biological process|G-protein coupled receptor protein signaling pathway|IEA|GO:0007186|MGI|na GO: cellular component|integral to membrane|TAS|GO:001602…
U67321	5.052	9.32e-05	A	caspase-7;lice1,LCE-LAP3 cysteine protease	Mm.35687	caspase-7;lice1,LCE-LAP3 cysteine protease		caspase 7	Casp7		12369	Embryonic Stem Cell ; Spleen ; embryo ; whole eye ; heart ; fetus ; Thymus ; head ; mammary gland ; whole embryo including extraembryonic tissues at 13.5-days postcoitum ; Whole eye ; kidney ; lung ; eyeball ; colon ; bone marrow ; cecum ; infiltrating ductal carcinoma ; brain ; embryonic body between diaphragm region and neck ; urinary bladder ; vagina ; thymus ; cerebellum ; spontaneous tumor, …	19	112		GO: molecular function|cysteine-type peptidase activity|IEA|GO:0008234|MGI|na GO: biological process|induction of apoptosis|ISS|GO:0006917|MGI|12819136 GO: biological process|proteolysis and peptidolysis|ISS|GO:0006508|MGI|12819136 GO: biological process|apoptosis|IEA|GO:0006915|MGI|na GO: molecular function|hydrolase activity|IEA|GO:0016787|MGI|na GO: molecular function|caspase activity|ISS|GO:0…
U70068	1.803	0.00928	P	woltag-gated potassium channal protein KQT-LIKE 1(KVLQT1);POTASSIUM VOTATAGE-GATED CHANNAL SUBFAMILY Q MEMBER 1(KCNQ1);KCNA9;KV1.9	Mm.5177	woltag-gated potassium channal protein KQT-LIKE 1(KVLQT1);POTASSIUM VOTATAGE-GATED CHANNAL SUBFAMILY Q MEMBER 1(KCNQ1);KCNA9;KV1.9		potassium voltage-gated channel, subfamily Q, member 1	Kcnq1		16535	tumor, gross tissue ; stomach ; urogenital ridge (embryonic) ; heart ; salivary gland ; colon ; eyeball ; inner ear ; tumor, metastatic to mammary ; gall bladder ; aorta and vein ; olfactory epithelium	7	38		GO: molecular function|voltage-gated ion channel activity|IEA|GO:0005244|MGI|na GO: molecular function|ion channel activity|IEA|GO:0005216|MGI|na GO: molecular function|cation channel activity|IEA|GO:0005261|MGI|na GO: molecular function|voltage-gated potassium channel activity|IEA|GO:0005249|MGI|na GO: molecular function|potassium channel activity|IEA|GO:0005267|MGI|na GO: biological process|cat…
U93848	1.772	0.0207	P	elongation factor-2 kinase mRNA	Mm.25997	elongation factor-2 kinase mRNA		eukaryotic elongation factor-2 kinase	Eef2k	7 F2	13631	whole body ; lung ; Whole brain ; whole brain ; whole joints ; Rathke's pouches ; kidney ; mammary gland ; bone marrow ; heart ; Upper Head ; placenta ; whole eye ; whole embryo including extraembryonic tissues at 13.5-days postcoitum ; embryo ; tongue ; skin ; tumor, biopsy sample ; in vitro fertilized eggs ; aorta and vein ; bone ; corpora quadrigemina ; spinal cord ; infiltrating ductal carcin…	7	169		GO: molecular function|ATP binding|IEA|GO:0005524|MGI|na GO: molecular function|protein serine/threonine kinase activity|IEA|GO:0004674|MGI|na GO: molecular function|calmodulin binding|IEA|GO:0005516|MGI|na GO: biological process|protein amino acid phosphorylation|IEA|GO:0006468|MGI|na GO: molecular function|transferase activity|IEA|GO:0016740|MGI|na
X01389	2.612	0.000639	A	gamma subunit of nerve growth factor (NGF).	Mm.347471	gamma subunit of nerve growth factor (NGF).		nerve growth factor, gamma	Ngfg		18050	salivary gland ; pancreas ; carcinoma ; testis	7	20		GO: molecular function|trypsin activity|IEA|GO:0004295|MGI|na GO: molecular function|tissue kallikrein activity|IEA|GO:0004293|MGI|na GO: molecular function|serine-type endopeptidase activity|IEA|GO:0004252|MGI|na GO: molecular function|growth factor activity|IEA|GO:0008083|MGI|na GO: molecular function|peptidase activity|IEA|GO:0008233|MGI|na GO: molecular function|receptor signaling protein act…
x63615	1.722	0.00343	P	camk2;calmodulin-depengent protein kinnase2(beta subnit)	Mm.4857	camk2;calmodulin-depengent protein kinnase2(beta subnit)		calcium/calmodulin-dependent protein kinase II, beta	Camk2b		12323	visual cortex ; whole brain ; retina ; brain - normal mediobasal hypothalamus ; brain ; cerebellum ; Whole brain ; pituitary gland ; pancreas ; embryonic limb, maxilla and mandible ; olfactory brain ; hypothalamus ; corpus striatum ; hippocampus ; head ; corpora quadrigemina ; eyeball ; colon ; Brain ; E6.5 whole embryo ; type B spermatogonia, pooled from multiple mice ; neural retina	11	150		GO: molecular function|calcium/calmodulin-dependent protein kinase activity|IEA|GO:0004685|MGI|na GO: molecular function|protein-tyrosine kinase activity|ISS|GO:0004713|MGI|12466851 GO: molecular function|ATP binding|IEA|GO:0005524|MGI|na GO: molecular function|protein serine/threonine kinase activity|IMP|GO:0004674|MGI|12660151 GO: molecular function|calmodulin binding|IEA|GO:0005516|MGI|na GO: …
x72395	5.405	6.5e-06		5-hydroxytryptamine(serotonin)receptor 3	Mm.4831	5-hydroxytryptamine(serotonin)receptor 3		5-hydroxytryptamine (serotonin) receptor 3A	Htr3a	9 A5.3	15561	visual cortex ; urinary bladder ; aorta and vein ; whole body ; cerebellum ; head ; spinal ganglion ; sympathetic ganglion ; cortex	9	36		GO: molecular function|extracellular ligand-gated ion channel activity|IEA|GO:0005230|MGI|na GO: molecular function|ion channel activity|IEA|GO:0005216|MGI|na GO: molecular function|receptor activity|IEA|GO:0004872|MGI|na GO: biological process|transport|IEA|GO:0006810|MGI|na GO: biological process|ion transport|IEA|GO:0006811|MGI|na GO: biological process|synaptic transmission|IEA|GO:0007268|MGI…
Y00671	1.82	0.00349	A	met proto-oncogene	Mm.86844	met proto-oncogene		met proto-oncogene	Met		17295	whole eye ; RPE/choroid ; Upper Head ; whole embryo including extraembryonic tissues at 13.5-days postcoitum ; pancreas ; infiltrating ductal carcinoma ; Pancreatic Bud ; tumor, biopsy sample ; tumor, metastatic to mammary ; Mesenchymal stem cell ; tumor, gross tissue ; Whole brain ; spontaneous tumor, metastatic to mammary. Stem cell origin. ; Newborn Kidney ; undifferentiated limb	6	29		GO: molecular function|protein-tyrosine kinase activity|IEA|GO:0004713|MGI|na GO: molecular function|ATP binding|IEA|GO:0005524|MGI|na GO: molecular function|protein serine/threonine kinase activity|ISS|GO:0004674|MGI|12466851 GO: molecular function|receptor activity|IEA|GO:0004872|MGI|na GO: molecular function|protein kinase activity|IEA|GO:0004672|MGI|na GO: biological process|brain development…
Z11574	2.145	0.00445	P	mRNA for son of sevenless 1	Mm.60975	mRNA for son of sevenless 1		Son of sevenless homolog 1 (Drosophila)	Sos1		20662	4-cell stage embryo ; medulla oblongata ; Hematopoietic Stem Cell (Lin-/c-Kit-/Sca-1+) ; melanoma ; testis ; skin ; hypothalamus ; aorta and vein ; cortex ; retina ; corpora quadrigemina ; spinal cord ; cerebellum ; eyeball ; heart ; head ; lung ; primary sorted bone marrow cells ; ovary ; Spleen ; adrenal gland ; adipose ; embryo ; whole brain ; Upper Head ; submandibular gland ; Embryonic Stem …	17	103		GO: molecular function|DNA binding|IEA|GO:0003677|MGI|na GO: molecular function|guanyl-nucleotide exchange factor activity|IEA|GO:0005085|MGI|na GO: biological process|small GTPase mediated signal transduction|IEA|GO:0007264|MGI|na GO: biological process|intracellular signaling cascade|IEA|GO:0007242|MGI|na

## Sheet: 2JA-DEGs
Array ID	M3 H_ratio	M3 H t-test p-value	M3 H_flags	Gene	unigene	Description	comment	title	gene	cytoband	locuslink	express	chromosome	count	summary	go
AA237855	1.875	0.00744		glucagon receptor	Mm.22329	glucagon receptor		glucagon receptor	Gcgr	11 E2	14527	liver ; lung ; gall bladder ; Kidney ; adrenal gland ; aorta and vein ; kidney ; liver tumor ; Trophoblast ; Liver ; amnion ; placenta	11	48		GO: molecular function|glucagon receptor activity|ISS|GO:0004967|MGI|12466851 GO: molecular function|G-protein coupled receptor activity|IEA|GO:0004930|MGI|na GO: molecular function|receptor activity|IEA|GO:0004872|MGI|na GO: biological process|G-protein coupled receptor protein signaling pathway|IEA|GO:0007186|MGI|na GO: cellular component|membrane|IEA|GO:0016020|MGI|na GO: cellular component|in…
AA272843	2.983	0.000243		coagulation factor 5	Mm.12900	coagulation factor 5		coagulation factor V	F5		14067	liver ; bone ; Whole brain ; whole brain ; Liver ; diaphragm ; infiltrating ductal carcinoma ; liver tumor ; Hematopoietic Stem Cell (Lin-/c-Kit+/Sca-1+) ; gall bladder ; blood	1	25		GO: molecular function|copper ion binding|ISS|GO:0005507|MGI|12466851 GO: biological process|blood coagulation|IEA|GO:0007596|MGI|na GO: biological process|cell adhesion|ISS|GO:0007155|MGI|12466851 GO: cellular component|extracellular space|TAS|GO:0005615|MGI|12466851
AA445731	1.797	0.0277	P	HEAT SHOCK PROTEIN ,70KD 1	Mm.6388	HEAT SHOCK PROTEIN ,70KD 1		heat shock protein 1A	Hspa1a	17 B1	193740	Hematopoietic Stem Cell (Lin-/c-Kit+/Sca-1+) ; whole body ; brain ; activated spleen ; visual cortex ; Pooled thyroids from 5 mice ; bone marrow ; whole joints ; stomach ; amnion ; Thymus ; embryo ; mammary gland ; whole brain ; uterus ; liver ; lung ; kidney ; placenta and extra embryonic tissue ; skin ; thymus ; tumor, gross tissue ; urinary bladder ; egg ; spontaneous tumor, metastatic to mamm…	17	98		GO: molecular function|ATP binding|IEA|GO:0005524|MGI|na GO: molecular function|heat shock protein activity|IEA|GO:0003773|MGI|na GO: molecular function|chaperone activity|IEA|GO:0003754|MGI|na GO: biological process|response to heat|IEA|GO:0009408|MGI|na
AA518595	2.061	0.00158		matrinlin 2	Mm.321748	matrinlin 2		Transcribed sequence with moderate similarity to protein sp:O00339 (H.sapiens) MTN2_HUMAN Matrilin-2			0	eyeball ; olfactory brain ; testis ; cecum ; spontaneous tumor, metastatic to mammary. Stem cell origin. ; pituitary gland ; sympathetic ganglion ; medulla oblongata ; gonad ; olfactory mucosa ; urinary bladder ; vagina ; skin ; visual cortex ; mammary gland ; xiphoid cartilage ; head ; embryo ; thymus ; Laser-captured isthmal cells from tox176 transgenic mice ; whole eye ; whole skin ; hypothala…		171
AA570953	2.838	0.000419		ATP binding cassette,sub-family C,5A	Mm.20845	ATP binding cassette,sub-family C,5A		ATP-binding cassette, sub-family C (CFTR/MRP), member 5	Abcc5		27416	whole brain ; Thymus ; thymus ; whole body ; heart ; retina ; amnion ; 6-day primitive type A spermatogonia ; Whole brain ; Upper Head ; placenta ; whole eye ; Pooled thyroids from 5 mice ; Embryonic Stem Cell ; embryo ; mammary gland ; lung ; whole embryo including extraembryonic tissues at 10.5-days postcoitum ; blastocyst ; Tcell ; diaphragm ; kidney ; inner ear ; visual cortex ; head ; urogen…	16	266	SUMMARY: Summary: The membrane-associated protein encoded by this gene is a member of the superfamily of ATP-binding cassette (ABC) transporters. ABC proteins transport various molecules across extra- and intra-cellular membranes. ABC genes are divided into seven distinct subfamilies (ABC1, MDR/TAP, MRP, ALD, OABP, GCN20, White). This protein is a member of the MRP subfamily which is involved in …	GO: molecular function|nucleotide binding|IEA|GO:0000166|MGI|na GO: molecular function|ATP binding|IEA|GO:0005524|MGI|na GO: molecular function|ATP-binding cassette (ABC) transporter activity|IEA|GO:0004009|MGI|na GO: biological process|transport|IEA|GO:0006810|MGI|na GO: cellular component|membrane|IEA|GO:0016020|MGI|na GO: cellular component|integral to membrane|TAS|GO:0016021|MGI|12466851 GO: …
AA671573	3.421	0.00224		chemokine (c-c)receptor 5	Mm.14302	chemokine (c-c)receptor 5		chemokine (C-C motif) receptor 5	Ccr5		12774	Hematopoietic Stem Cell (Lin-/c-Kit-/Sca-1+) ; Spleen ; whole body ; bone marrow ; whole eye ; lymph node ; mammary gland ; uterus ; tumor, metastatic to mammary ; aorta and vein ; spinal ganglion ; kidney ; infiltrating ductal carcinoma ; adipose ; spontaneous tumor, metastatic to mammary. Stem cell origin.	9	187		GO: molecular function|G-protein coupled receptor activity|IEA|GO:0004930|MGI|na GO: biological process|G-protein coupled receptor protein signaling pathway|IEA|GO:0007186|MGI|na GO: biological process|chemotaxis|IEA|GO:0006935|MGI|na GO: biological process|defense response|IMP|GO:0006952|MGI|10528159 GO: cellular component|integral to membrane|TAS|GO:0016021|MGI|12466851 GO: molecular function|C…
AA980349	3.935	0.000128	A	glutathione peroxidase 2	Mm.57225	glutathione peroxidase 2		glutathione peroxidase 2	Gpx2		14776	colon epithelia progenitor cells ; Pooled thyroids from 5 mice ; lung ; small intestine ; tumor, gross tissue ; colon ; bowel ; Organ of Corti/Ear ; mammary gland ; pancreas ; spontaneous tumor, metastatic to mammary. Stem cell origin.	12	38		GO: molecular function|peroxidase activity|IEA|GO:0004601|MGI|na GO: molecular function|glutathione peroxidase activity|ISS|GO:0004602|MGI|9637305 GO: biological process|response to oxidative stress|IEA|GO:0006979|MGI|na GO: cellular component|cytosol|TAS|GO:0005829|MGI|9315306 GO: molecular function|oxidoreductase activity|IEA|GO:0016491|MGI|na
AB000096	1.7	0.00224	P	Mus musculus mRNA for GATA-2 protein, complete cds.	Mm.272747	ENDOTHELIAL TRANSCRIPION FACTOR GATA-2		GATA binding protein 2	Gata2		14461	Gastric Epithelial Progenitor ; whole eye ; Whole eye ; carcinoma ; fetus ; Liver ; blastocyst ; head ; placenta and extra embryonic tissue ; skin ; testis ; thymus ; pituitary gland ; urinary bladder ; bone ; spinal cord ; stomach ; sympathetic ganglion ; spontaneous tumor, metastatic to mammary. Stem cell origin. ; adrenal gland ; Spleen ; mammary gland ; tumor, gross tissue ; Newborn Heart ; v…	6	160		GO: molecular function|DNA binding|IDA|GO:0003677|MGI|12023274 GO: molecular function|transcription factor activity|IEA|GO:0003700|MGI|na GO: biological process|regulation of transcription, DNA-dependent|IEA|GO:0006355|MGI|na GO: cellular component|nucleus|IEA|GO:0005634|MGI|na
AB042807	1.93	0.00794		RGS mRNA, complete cds	Mm.253927	RGS mRNA, complete cds		regulator of G-protein signaling 18	Rgs18	1 F	64214	activated spleen ; bone ; Testicles ; vagina ; aorta and vein ; stomach ; Pooled thyroids from 5 mice ; whole body ; heart ; germinal B-cell ; bone marrow ; Hematopoietic	1	35		GO: molecular function|GTPase activator activity|IDA|GO:0005096|MGI|11342430 GO: molecular function|signal transducer activity|IEA|GO:0004871|MGI|na GO: biological process|regulation of G-protein coupled receptor protein signaling pathway|IDA|GO:0008277|MGI|11042171 GO: biological process|G-protein coupled receptor protein signaling pathway|IPI|GO:0007186|MGI|11342430 GO: biological process|signa…
AF006040	2.351	0.00012		Fas-binding protein (Daxx) mRNA	Mm.271809	Fas-binding protein (Daxx) mRNA		Fas death domain-associated protein	Daxx		13163	bone marrow ; thymus ; whole body ; head ; placenta ; primary cultures of Sertoli cells ; tumor, gross tissue ; 18-day preleptotene spermatocytes ; pancreas ; whole embryo including extraembryonic tissues at 10.5-days postcoitum ; whole brain ; whole eye ; E6.5 whole embryo ; pituitary gland ; Embryonic Stem Cell ; embryo ; melanoma ; Spleen ; whole embryo including extraembryonic tissues at 8.5-…	17	217		GO: molecular function|protein binding|IPI|GO:0005515|MGI|12529400 GO: cellular component|nucleus|IDA|GO:0005634|MGI|12529400 GO: molecular function|transcriptional repressor activity|IDA|GO:0016564|MGI|12529400 GO: cellular component|PML body|IDA|GO:0016605|MGI|12529400
AF015948	2.875	0.000139		TRANSCRIPTION FACTOR E2F3(E2F-3)	Mm.268356	TRANSCRIPTION FACTOR E2F3(E2F-3)		E2F transcription factor 3	E2f3	13 A3.2	13557	Thymus ; spontaneous tumor, metastatic to mammary. Stem cell origin. ; whole eye ; Undifferentiated ES Cell ; pancreas ; Upper Head ; Rathke's pouches ; activated spleen ; mammary gland ; lung ; whole embryo including extraembryonic tissues at 13.5-days postcoitum ; Embryonic Stem Cell ; whole brain ; heart ; brain ; primary cultures of Sertoli cells ; whole embryo including extraembryonic tissue…	13	127		GO: molecular function|protein binding|IPI|GO:0005515|MGI|11980909 GO: molecular function|DNA binding|IDA|GO:0003677|MGI|11980909 GO: molecular function|transcription factor activity|IDA|GO:0003700|MGI|11980909 GO: biological process|cell cycle|IEA|GO:0007049|MGI|na GO: biological process|regulation of transcription, DNA-dependent|IDA|GO:0006355|MGI|11980909 GO: biological process|regulation of c…
AF016189	3.952	0.0384	A	SMAD3 (mSmad3) mRNA, complete cds	Mm.7320	SMAD3 (mSmad3) mRNA, complete cds		MAD homolog 3 (Drosophila)	Smad3		17127	embryo ; Whole brain ; Pooled - Molar ; whole eye ; whole embryo including extraembryonic tissues at 8.5-days postcoitum ; pancreas ; Upper Head ; whole brain ; whole embryo including extraembryonic tissues at 13.5-days postcoitum ; Embryonic Stem Cell ; whole embryo including extraembryonic tissues at 10.5-days postcoitum ; lymph node ; Thymus ; head ; primary cultures of Sertoli cells ; optic v…	9	170		GO: molecular function|transcription factor binding|IPI|GO:0008134|MGI|9702197 GO: molecular function|protein binding|IPI|GO:0005515|MGI|11711431,12543979 GO: molecular function|transcription factor activity|IDA|GO:0003700|MGI|12466851,12943993 GO: biological process|SMAD protein heteromerization|IEA|GO:0007183|MGI|na GO: biological process|transforming growth factor beta receptor signaling pathw…
AF020184	3.35	0.0045	A	neuronal calcium sensor-1 (NCS-1) mRNA, complete cds	Mm.249318	neuronal calcium sensor-1 (NCS-1) mRNA, complete cds		frequenin homolog (Drosophila)	Freq	2 B	14299	whole brain ; embryo ; Upper Head ; whole skin ; mammary gland ; whole eye ; Thymus ; embryonic body between diaphragm region and neck ; inner ear ; diencephalon ; cerebellum ; corpus striatum ; spinal ganglion ; mandible ; branchial arches ; tumor, gross tissue ; Mesenchymal stem cell ; neural retina ; visual cortex ; Whole brain ; Osteoblast ; submandibular gland ; brain ; sympathetic ganglion …	2	146	NULL	NULL
AF036355	3.09	0.00014		SH2 domain-containing putative adapter SH2-B mRNA	Mm.8538	SH2 domain-containing putative adapter SH2-B mRNA		SH2-B PH domain containing signaling mediator 1	Sh2bpsm1		20399	whole brain ; spermatocytes, pooled from multiple mice ; spinal cord ; Whole brain ; E6.5 whole embryo ; small intestinal epithelial progenitors ; eye ; Gastric Epithelial Progenitor ; colon epithelia progenitor cells ; whole eye ; Upper Head ; Embryonic Stem Cell ; embryo ; heart ; Thymus ; RPE/choroid ; Laser-captured isthmal cells from tox176 transgenic mice ; lymph node ; Liver ; fetus ; mamm…	7	222		GO: molecular function|protein binding|IPI|GO:0005515|MGI|11786545 GO: biological process|intracellular signaling cascade|ISS|GO:0007242|MGI|12466851 GO: biological process|cell motility|IDA|GO:0006928|MGI|11786545 GO: biological process|lamellipodium biogenesis|IDA|GO:0030032|MGI|11786545 GO: cellular component|ruffles|TAS|GO:0001726|MGI|11786545
AF069542	2.59	0.000619		NF-KB essential modulator;IKB kinase gamma subnit (IKK-GAMMA)essential regulatory subnit	Mm.12967	NF-KB essential modulator;IKB kinase gamma subnit (IKK-GAMMA)essential regulatory subnit		inhibitor of kappaB kinase gamma	Ikbkg	X A7.1	16151	mammary gland ; whole eye ; primary cultures of Sertoli cells ; whole brain ; inner ear ; diencephalon ; Blastocyst ; pancreas ; brain ; Rathke's pouches ; whole body ; activated spleen ; whole embryo including extraembryonic tissues at 11.5-days postcoitum ; embryo ; Spleen ; liver ; fetus ; heart ; head ; uterus ; Thymus ; skin ; ovary and uterus ; colon ; pituitary gland ; testis ; macrophage …	X	254		GO: biological process|regulation of transcription, DNA-dependent|IEA|GO:0006355|MGI|na GO: cellular component|nucleus|IEA|GO:0005634|MGI|na GO: molecular function|kinase activity|IEA|GO:0016301|MGI|na GO: biological process|B-cell homeostasis|IMP|GO:0001782|MGI|12235208
AF122923	3.729	4.58e-05	A	inhibitory factor-1 mRNA, complete cds.	Mm.32831	inhibitory factor-1 mRNA, complete cds.		Wnt inhibitory factor 1	Wif1	10 D2	24117	inner ear ; head ; testis ; cerebellum ; mammary gland ; embryonic body between diaphragm region and neck ; urinary bladder ; bone ; hypothalamus ; aorta and vein ; corpora quadrigemina ; tumor, gross tissue ; cortex ; spinal ganglion ; eyeball ; heart ; stomach ; lung ; tumor, biopsy sample ; spontaneous tumor, metastatic to mammary. Stem cell origin. ; tumor, metastatic to mammary ; whole body …	10	110		GO: molecular function|protein-tyrosine kinase activity|IEA|GO:0004713|MGI|na GO: molecular function|structural molecule activity|IEA|GO:0005198|MGI|na GO: biological process|development|IEA|GO:0007275|MGI|na GO: cellular component|extracellular space|TAS|GO:0005615|MGI|12466851 GO: biological process|Wnt receptor signaling pathway|IEA|GO:0016055|MGI|na
AF343352	2.171	0.00177		Nkd mRNA	Mm.30219	Nkd mRNA		naked cuticle 1 homolog (Drosophila)	Nkd1	8 C3	93960	embryo ; Pooled thyroids from 5 mice ; whole embryo including extraembryonic tissues at 13.5-days postcoitum ; whole skin ; Liver ; head ; eye ; olfactory brain ; urinary bladder ; spinal cord ; cerebellum ; spinal ganglion ; eyeball ; spontaneous tumor, metastatic to mammary. Stem cell origin. ; branchial arches ; salivary gland ; liver ; in vitro fertilized eggs ; pituitary gland ; whole eye ; …	8	102		GO: molecular function|calcium ion binding|ISS|GO:0005509|MGI|12466851
AF384162	4.655	2.31e-05	A	diacylglycerol acyltransferase 2-like protein mRNA	Mm.41325	diacylglycerol acyltransferase 2-like protein mRNA		monoacylglycerol O-acyltransferase 1	Mogat1	1 C4	68393	kidney ; mammary gland ; stomach ; spleen ; medulla oblongata ; Brain ; whole body	1	43		GO: molecular function|acyltransferase activity|IEA|GO:0008415|MGI|na GO: molecular function|transferase activity|IEA|GO:0016740|MGI|na
AI385961	2.184	0.00803	A	CAMP responsive element modulator	Mm.5244	CAMP responsive element modulator		cAMP responsive element modulator	Crem	18 A	12916	testis ; mammary gland ; Hematopoietic Stem Cell (Lin-/c-Kit-/Sca-1-) ; embryo ; Thymus ; whole body ; round spermatids, pooled from multiple mice ; placenta ; tongue ; liver ; cerebellum ; hypothalamus ; spinal cord ; thymus ; cortex ; heart ; visual cortex ; brain ; head ; tumor, metastatic to mammary ; epididymis ; salivary gland ; tumor, gross tissue ; liver tumor ; whole brain ; Organ of Cor…	18	152		GO: molecular function|protein binding|IEA|GO:0005515|MGI|na GO: molecular function|DNA binding|IDA|GO:0003677|MGI|11354513 GO: molecular function|transcription factor activity|IEA|GO:0003700|MGI|na GO: biological process|regulation of transcription, DNA-dependent|IEA|GO:0006355|MGI|na GO: biological process|spermatogenesis|TAS|GO:0007283|MGI|12062093 GO: cellular component|transcription factor c…
AJ223069	1.837	0.00086		mRNA for TCF-3 protein	Mm.286449	mRNA for TCF-3 protein		transcription factor 3	Tcf3		21415	embryo ; eye ; whole eye ; whole embryo including extraembryonic tissues at 11.5-days postcoitum ; placenta ; Thymus ; heart ; melanoma ; pooled organs ; ectoplacental cone ; hypothalamus ; kidney ; lung ; tumor, metastatic to mammary ; spontaneous tumor, metastatic to mammary. Stem cell origin. ; colon ; whole embryo ; tumor, gross tissue ; undifferentiated limb ; Fetal Liver ; neural retina	6	69		GO: molecular function|DNA binding|ISS|GO:0003677|MGI|12466851 GO: molecular function|transcription factor activity|IEA|GO:0003700|MGI|na GO: biological process|regulation of transcription, DNA-dependent|IEA|GO:0006355|MGI|na GO: cellular component|transcription factor complex|IEA|GO:0005667|MGI|na GO: cellular component|nucleus|IEA|GO:0005634|MGI|na GO: biological process|Wnt receptor signaling …
AJ237590	4.059	0.00201	A	BARHL1 protein	Mm.21390	BARHL1 protein		BarH-like 1 (Drosophila)	Barhl1		54422	cerebellum ; head ; whole brain	2	33		GO: molecular function|transcription factor activity|ISS|GO:0003700|MGI|12466851 GO: biological process|perception of sound|IMP|GO:0007605|MGI|12091321 GO: biological process|regulation of transcription, DNA-dependent|ISS|GO:0006355|MGI|12466851 GO: cellular component|nucleus|ISS|GO:0005634|MGI|12466851
AJ243963	3.851	0.00486		mRNA for dickkopf-2 (dkk-2 gene).	Mm.103593	mRNA for dickkopf-2 (dkk-2 gene).		dickkopf homolog 2 (Xenopus laevis)	Dkk2	3 G3	56811	whole joints ; whole body ; Upper Head ; fetus ; lymph node ; head ; Newborn Kidney ; lung ; whole eye ; eye ; whole brain ; kidney ; tumor, gross tissue ; eyeball ; embryonic body between diaphragm region and neck ; Male genital ridge/mesonephros ; Total pancreas ; olfactory epithelium	3	47		GO: biological process|development|IEA|GO:0007275|MGI|na GO: cellular component|extracellular|ISS|GO:0005576|MGI|10495270 GO: cellular component|extracellular space|TAS|GO:0005615|MGI|12466851 GO: biological process|Wnt receptor signaling pathway|IEA|GO:0016055|MGI|na
AJ250669	5.03	0.000312	A	gab1 gene for GRB2-associated binding protein 1	Mm.277409	gab1 gene for GRB2-associated binding protein 1		growth factor receptor bound protein 2-associated protein 1	Gab1		14388	Embryonic Stem Cell ; kidney ; whole eye ; heart ; pancreas ; Thymus ; whole embryo including extraembryonic tissues at 13.5-days postcoitum ; E6.5 whole embryo ; E9.5 whole embryo ; embryonic limb, maxilla and mandible ; whole brain ; Pooled - Molar ; visual cortex ; whole embryo including extraembryonic tissues at 10.5-days postcoitum ; whole embryo including extraembryonic tissues at 11.5-days…	8	256		GO: molecular function|receptor activity|IEA|GO:0004872|MGI|na GO: molecular function|signal transducer activity|IDA|GO:0004871|MGI|11940581 GO: biological process|activation of MAPK|IDA|GO:0000187|MGI|11940581 GO: biological process|signal transduction|IDA|GO:0007165|MGI|11940581
AJ555877	2.892	0.000291		Mus musculus mRNA for adenosine A1 receptor (ADORA1 gene).	Mm.298908	Mus musculus mRNA for adenosine A1 receptor (ADORA1 gene).		adenosine A1 receptor	Adora1	1 E4	11539	visual cortex ; whole joints ; brain ; mammary gland ; stomach ; olfactory brain ; hippocampus ; liver ; Newborn Kidney ; whole body ; medulla oblongata ; placenta ; diencephalon ; hypothalamus ; aorta and vein ; cortex ; corpora quadrigemina ; Whole brain ; corpus striatum ; cerebellum ; heart ; salivary gland ; tumor, gross tissue ; kidney ; ovary ; Newborn Heart ; Trophoblast stem cell ; olfac…	1	174		GO: molecular function|G-protein coupled receptor activity|IEA|GO:0004930|MGI|na GO: molecular function|receptor activity|IEA|GO:0004872|MGI|na GO: biological process|G-protein coupled receptor protein signaling pathway|IEA|GO:0007186|MGI|na GO: cellular component|integral to membrane|TAS|GO:0016021|MGI|12466851 GO: molecular function|adenosine receptor activity, G-protein coupled|ISS|GO:0001609|…
AK018592	2.241	0.0115	A	similar to TNF RECEPTOR TYPE 1	Mm.264255	similar to TNF RECEPTOR TYPE 1		TNFRSF1A-associated via death domain	Tradd		71609	activated spleen ; liver ; placenta ; mammary gland ; pooled organs ; whole body ; germinal B-cell from resting spleen ; thymus ; head ; spinal ganglion ; oviduct ; branchial arches ; pooled lung tumors ; Thymus ; blastocyst ; urinary bladder ; small intestine ; cecum ; whole joints ; submandibular gland ; mullerian duct includes surrounding region ; subfornical organ and postrema	8	73		GO: biological process|apoptosis|ISS|GO:0006915|MGI|12466851,12819136 GO: biological process|regulation of apoptosis|ISS|GO:0042981|MGI|12819136
AY005801	2.973	0.000164	A	Sox-30 mRNA, complete cds	Mm.66708	Sox-30 mRNA, complete cds		SRY-box containing gene 30	Sox30	11 B1.1	214105	testis ; head ; Testicles	11	10		GO: molecular function|transcription factor activity|IEA|GO:0003700|MGI|na GO: biological process|regulation of transcription, DNA-dependent|IEA|GO:0006355|MGI|na GO: cellular component|transcription factor complex|IEA|GO:0005667|MGI|na
BC003298	3.352	0.016	P	paxillin, mRNA (cDNA clone IMAGE:3583842), partial	Mm.18714	paxillin, mRNA (cDNA clone IMAGE:3583842), partial		paxillin	Pxn		19303	inner ear ; activated spleen ; whole joints ; bone marrow ; lung ; whole body ; mammary gland ; whole brain ; stomach ; amnion ; visual cortex ; E6.5 whole embryo ; uterus ; E9.5 whole embryo ; lung and heart ; Organ of Corti/Ear ; pancreas ; kidney ; embryo ; pooled organs ; fetus ; macrophage ; Thymus ; tumor, gross tissue ; placenta ; RPE/choroid ; head ; Upper Head ; epididymis ; bowel ; embr…	5	514		GO: molecular function|protein binding|IPI|GO:0005515|MGI|11825902,12695331,14580336,14636584 GO: biological process|activation of MAPK|IDA|GO:0000187|MGI|14636584 GO: biological process|integrin-mediated signaling pathway|IMP|GO:0007229|MGI|11784865,11825902 GO: biological process|cytoskeleton organization and biogenesis|IMP|GO:0007010|MGI|11784865 GO: biological process|cell-matrix adhesion|ISS…
BC005656	2.705	9.33e-05	P	regulator of G-protein signaling 5, mRNA (cDNA clone IMAGE:3710250)	Mm.20954	regulator of G-protein signaling 5, mRNA (cDNA clone IMAGE:3710250)		regulator of G-protein signaling 5	Rgs5		19737	mammary gland ; heart ; Whole brain ; RPE/choroid ; Pooled thyroids from 5 mice ; whole embryo including extraembryonic tissues at 10.5-days postcoitum ; Thymus ; Pooled - Molar ; Spleen ; pancreas ; embryonic limb, maxilla and mandible ; whole body ; bowel ; urogenital ridge (embryonic) ; small intestine ; head ; ovary and uterus ; olfactory brain ; tumor, gross tissue ; lymph node ; activated s…	1	240		GO: molecular function|GTPase activator activity|TAS|GO:0005096|MGI|11342430 GO: molecular function|signal transducer activity|IEA|GO:0004871|MGI|na GO: biological process|G-protein coupled receptor protein signaling pathway|TAS|GO:0007186|MGI|11342430 GO: biological process|signal transduction|IEA|GO:0007165|MGI|na
BC006626	2.672	3.24e-05		protein phosphatase 2A, regulatory subunit B (PR 53)	Mm.275393	protein phosphatase 2A, regulatory subunit B (PR 53)		protein phosphatase 2A, regulatory subunit B (PR 53)	Ppp2r4	2 B	110854	visual cortex ; whole body ; kidney ; Embryonic Stem Cell ; whole embryo including extraembryonic tissues at 11.5-days postcoitum ; embryo ; heart ; liver ; testis ; Thymus ; blastocyst ; tumor, biopsy sample ; whole embryo including extraembryonic tissues at 13.5-days postcoitum ; whole skin ; lymph node ; pooled organs ; Liver ; Osteoblast ; Spleen ; bone marrow ; skin ; thymus ; uterus ; stoma…	2	591	NULL	NULL
BC006860	2.147	0.0108		Mus musculus transcription factor E2a, mRNA	Mm.3406	Mus musculus transcription factor E2a, mRNA		transcription factor E2a	Tcfe2a		21423	liver ; lymph node ; Upper Head ; skin ; pancreas ; testis ; dissected endoderm ; adrenal gland ; infiltrating ductal carcinoma ; inner ear ; bone ; hypothalamus ; diencephalon ; egg ; parthenogenote ; corpora quadrigemina ; forebrain ; tumor, gross tissue ; whole brain ; small intestine ; diaphragm ; fetus ; mammary gland ; whole skin ; blastocyst ; ectoplacental cone ; thymus ; whole eye ; amni…	10	309		GO: molecular function|protein binding|IPI|GO:0005515|MGI|12200424,14757642 GO: molecular function|DNA binding|IDA|GO:0003677|MGI|14757642 GO: molecular function|transcription factor activity|TAS|GO:0003700|MGI|8001124 GO: biological process|regulation of transcription, DNA-dependent|IDA|GO:0006355|MGI|12200424 GO: cellular component|transcription factor complex|IDA|GO:0005667|MGI|12200424 GO: ce…
BC030859	3.764	0.000128	A	Mus musculus cyclin G associated kinase, mRNA	Mm.276647	Mus musculus cyclin G associated kinase, mRNA		cyclin G associated kinase	Gak	5 F	231580	visual cortex ; blastocyst ; head ; placenta ; uterus ; Tcell ; skin ; thymus ; cerebellum ; whole skin ; testis ; urinary bladder ; bone ; vagina ; Mesenchymal stem cell ; hypothalamus ; spinal cord ; aorta and vein ; cortex ; parthenogenote ; corpora quadrigemina ; embryo ; whole embryo including extraembryonic tissues at 11.5-days postcoitum ; tumor, gross tissue ; whole brain ; E9.5 whole emb…	5	479		GO: molecular function|ATP binding|IEA|GO:0005524|MGI|na GO: molecular function|protein serine/threonine kinase activity|IEA|GO:0004674|MGI|na GO: molecular function|protein kinase activity|IEA|GO:0004672|MGI|na GO: biological process|cell cycle|IEA|GO:0007049|MGI|na GO: biological process|protein amino acid phosphorylation|IEA|GO:0006468|MGI|na GO: cellular component|endoplasmic reticulum|IEA|GO…
BC037390	2.983	0.00528	P	Mus musculus retinoblastoma-associated protein 140, mRNA	Mm.247767	Mus musculus retinoblastoma-associated protein 140, mRNA		DNA segment, Chr 14, Abbott 1 expressed	D14Abb1e	14 A3	218850	Pooled - Molar ; Total pancreas ; pancreas ; whole eye ; small intestinal epithelial progenitors ; Upper Head ; whole embryo including extraembryonic tissues at 13.5-days postcoitum ; Embryonic Stem Cell ; Thymus ; testis ; Rathke's pouches ; inner ear ; whole body ; bone marrow ; embryo ; thymus ; Spleen ; ectoplacental cone ; skin ; mammary gland ; fetus ; diencephalon ; hypothalamus ; cerebell…	14	145	NULL	NULL
D10028	6.417	0.000264		GLUTAMATE (NMDA)RECEPTOR SUBNIT ZATA 1 PRECURSOR (NR1)(MND-R1)(N-METHYL-D-ASPARTATE RECEPTOR)	Mm.278672	GLUTAMATE (NMDA)RECEPTOR SUBNIT ZATA 1 PRECURSOR (NR1)(MND-R1)(N-METHYL-D-ASPARTATE RECEPTOR)		glutamate receptor, ionotropic, NMDA1 (zeta 1)	Grin1		14810	whole brain ; visual cortex ; cerebellum ; embryo ; inner ear ; 4-cell stage embryo ; hypothalamus ; brain ; retina ; Whole brain ; skin ; eyeball	2	66		GO: molecular function|glutamate-gated ion channel activity|IEA|GO:0005234|MGI|na GO: molecular function|ion channel activity|IEA|GO:0005216|MGI|na GO: molecular function|potassium channel activity|ISS|GO:0005267|MGI|12466851 GO: molecular function|protein binding|IPI|GO:0005515|MGI|11754835 GO: molecular function|transporter activity|IEA|GO:0005215|MGI|na GO: molecular function|receptor binding|…
D16306	1.787	0.0367	P	Mouse ERCC5 (DNA repair gene) mRNA, complete cds.	Mm.2213	Mouse ERCC5 (DNA repair gene) mRNA, complete cds.		excision repair cross-complementing rodent repair deficiency,complementation group 5	Ercc5		22592	whole embryo including extraembryonic tissues at 13.5-days postcoitum ; Embryonic Stem Cell ; 4-cell stage embryo ; carcinoma ; placenta and extra embryonic tissue ; whole embryo including extraembryonic tissues at 10.5-days postcoitum ; cerebellum ; Hematopoietic Stem Cell (Lin-/c-Kit-/Sca-1-) ; bone ; head ; whole brain ; Upper Head ; Thymus ; hypothalamus ; pancreas ; whole eye ; Newborn Kidne…	1	128		GO: molecular function|nuclease activity|IEA|GO:0004518|MGI|na GO: molecular function|endonuclease activity|IEA|GO:0004519|MGI|na GO: molecular function|single-stranded DNA binding|IEA|GO:0003697|MGI|na GO: molecular function|DNA binding|IEA|GO:0003677|MGI|na GO: biological process|nucleotide-excision repair|IEA|GO:0006289|MGI|na GO: biological process|DNA repair|IEA|GO:0006281|MGI|na GO: cellula…
D28492	3.749	0.000191	A	caspase-2 precursor(CASP2);NEDD protein;ICH-1 protease	Mm.3921	caspase-2 precursor(CASP2);NEDD protein;ICH-1 protease		caspase 2	Casp2		12366	lung ; inner ear ; thymus ; mammary gland ; kidney ; activated spleen ; whole embryo including extraembryonic tissues at 10.5-days postcoitum ; heart ; embryo ; Thymus ; lymph node ; whole skin ; macrophage ; brain ; fetus ; tongue ; skin ; head ; embryonic limb, maxilla and mandible ; tumor, biopsy sample ; infiltrating ductal carcinoma ; tumor, gross tissue ; Tcell ; placenta ; blood ; testis ;…	6	412		GO: molecular function|cysteine-type peptidase activity|IEA|GO:0008234|MGI|na GO: molecular function|protein binding|IPI|GO:0005515|MGI|12477715 GO: biological process|induction of apoptosis|IDA|GO:0006917|MGI|8087842,12477715,12819136 GO: biological process|proteolysis and peptidolysis|ISS|GO:0006508|MGI|12819136 GO: biological process|apoptosis|IEA|GO:0006915|MGI|na GO: cellular component|intra…
D70849	2.292	0.0164		Mouse mRNA for Zic3 protein, complete cds.	Mm.255890	D70849		zinc finger protein of the cerebellum 3	Zic3		22773	cerebellum ; embryonic body between diaphragm region and neck ; spinal cord ; Embryonic Stem Cell ; Upper Head ; whole body ; testis ; eyeball ; olfactory brain ; pooled lung tumors ; brain ; ovary ; whole brain	X	70		GO: molecular function|nucleic acid binding|IEA|GO:0003676|MGI|na GO: molecular function|DNA binding|IEA|GO:0003677|MGI|na GO: biological process|pattern specification|IMP|GO:0007389|MGI|11959836 GO: biological process|regulation of transcription, DNA-dependent|IEA|GO:0006355|MGI|na GO: cellular component|nucleus|IEA|GO:0005634|MGI|na
J05205	1.959	0.000466	P	JUN-D	Mm.1175	JUN-D		Jun proto-oncogene related gene d1	Jund1		16478	tumor, gross tissue ; pooled organs ; infiltrating ductal carcinoma ; Pooled thyroids from 5 mice ; Tcell ; tumor, biopsy sample ; embryo ; tumor, metastatic to mammary ; corpora quadrigemina ; colon ; Liver ; mammary gland ; Whole eye ; liver ; uterus ; RPE/choroid ; retina ; fetus ; type A spermatogonia, pooled from multiple mice ; salivary gland ; kidney ; germinal B-cell ; mandible ; Islets o…	8	161	SUMMARY: Summary: The protein encoded by this intronless gene is a member of the JUN family, and a functional component of the AP1 transcription factor complex. It has been proposed to protect cells from p53-dependent senescence and apoptosis. Alternate translation initiation site usage, including non-AUG codons, results in the production of different isoforms.	GO: molecular function|DNA binding|IEA|GO:0003677|MGI|na GO: molecular function|transcription factor activity|IEA|GO:0003700|MGI|na GO: biological process|cell growth and/or maintenance|IEA|GO:0008151|MGI|na GO: biological process|regulation of transcription, DNA-dependent|IEA|GO:0006355|MGI|na GO: biological process|regulation of cell cycle|IEA|GO:0000074|MGI|na GO: cellular component|intracellu…
L21973	4.512	0.000617		TRANSCRIPTION FACTOR E2F1(E2F-1)	Mm.18036	TRANSCRIPTION FACTOR E2F1(E2F-1)		E2F transcription factor 1	E2f1		13555	visual cortex ; thymus ; pituitary gland ; placenta ; 4-cell stage embryo ; carcinoma ; lymph node ; mammary gland ; blastocyst ; skin ; ovary and uterus ; adipose ; in vitro fertilized eggs ; bone marrow ; embryonic body between diaphragm region and neck ; cerebellum ; corpora quadrigemina ; hippocampus ; pancreas ; eyeball ; embryo ; infiltrating ductal carcinoma ; egg ; branchial arches ; whol…	2	101		GO: molecular function|protein binding|IPI|GO:0005515|MGI|14593116 GO: molecular function|DNA binding|IEA|GO:0003677|MGI|na GO: molecular function|transcription factor activity|IDA|GO:0003700|MGI|10779331,11095619 GO: biological process|cell cycle|IEA|GO:0007049|MGI|na GO: biological process|regulation of transcription, DNA-dependent|IDA|GO:0006355|MGI|14593116 GO: biological process|apoptosis|ID…
L35049	1.857	0.000712	P	bcl-x;BCL2L1	Mm.238213	bcl-x;BCL2L1		Bcl2-like 1	Bcl2l1		12048	visual cortex ; mammary gland ; kidney ; sympathetic ganglion ; liver ; whole body ; bone marrow ; 6-day primitive type A spermatogonia ; whole eye ; 18-day preleptotene spermatocytes ; placenta ; Hematopoietic Stem Cell (Lin-/c-Kit+/Sca-1-) ; RPE/choroid ; whole embryo including extraembryonic tissues at 11.5-days postcoitum ; embryo ; heart ; fetus ; infiltrating ductal carcinoma ; aorta and ve…	2	303		GO: molecular function|protein binding|IPI|GO:0005515|MGI|11463391,11717309,12115603 GO: biological process|anti-apoptosis|IDA|GO:0006916|MGI|11717309 GO: biological process|apoptosis|IDA|GO:0006915|MGI|12115603 GO: cellular component|membrane|IEA|GO:0016020|MGI|na GO: cellular component|mitochondrion|IEA|GO:0005739|MGI|na GO: cellular component|integral to membrane|IEA|GO:0016021|MGI|na
M14639	1.899	0.00168	A	interleukin-1 mRNA	Mm.15534	interleukin-1 mRNA		interleukin 1 alpha	Il1a		16175	activated spleen ; bone marrow ; mammary gland ; tumor, biopsy sample	2	25		GO: molecular function|interleukin-1 receptor binding|IEA|GO:0005149|MGI|na GO: molecular function|cytokine activity|IEA|GO:0005125|MGI|na GO: molecular function|growth factor activity|IEA|GO:0008083|MGI|na GO: biological process|immune response|IEA|GO:0006955|MGI|na GO: biological process|cell proliferation|IEA|GO:0008283|MGI|na GO: biological process|regulation of cell cycle|IEA|GO:0000074|MGI|…
M20473	2.257	0.000169	P	Camp-dependent protein kinase type 1-beta regulatory chain	Mm.306163	Camp-dependent protein kinase type 1-beta regulatory chain		protein kinase, cAMP dependent regulatory, type I beta	Prkar1b		19085	visual cortex ; diencephalon ; brain ; testis ; hypothalamus ; spontaneous tumor, metastatic to mammary. Stem cell origin. ; skin ; spinal cord ; spinal ganglion ; ovary ; whole body ; neural retina ; Trophoblast stem cell ; hippocampus ; pancreas ; whole brain ; subfornical organ and postrema ; Brain ; cortex ; cerebellum ; embryo ; whole embryo including extraembryonic tissues at 13.5-days post…	5	357		GO: molecular function|cAMP-dependent protein kinase regulator activity|ISS|GO:0008603|MGI|3375237,8032683 GO: biological process|learning and/or memory|IMP|GO:0007611|MGI|7568030 GO: biological process|protein amino acid phosphorylation|TAS|GO:0006468|MGI|7775586 GO: biological process|cell proliferation|TAS|GO:0008283|MGI|7775586 GO: biological process|signal transduction|IEA|GO:0007165|MGI|na …
M32502	1.853	0.00436	P	proto-oncogene Wnt-3 protein mRNA, complete cds	Mm.5188	proto-oncogene Wnt-3 protein mRNA, complete cds		wingless-related MMTV integration site 3	Wnt3		22415	cerebellum ; Embryonic Stem Cell ; small intestinal epithelial progenitors ; Whole brain ; corpora quadrigemina ; embryonic body between diaphragm region and neck	11	15		GO: molecular function|receptor binding|TAS|GO:0005102|MGI|9889131 GO: molecular function|signal transducer activity|IEA|GO:0004871|MGI|na GO: biological process|cell growth and/or maintenance|IEA|GO:0008151|MGI|na GO: biological process|development|IEA|GO:0007275|MGI|na GO: biological process|signal transduction|TAS|GO:0007165|MGI|9889131 GO: biological process|cell-cell signaling|TAS|GO:0007267…
M60909	3.475	0.000511	A	Mouse retinoic acid receptor alpha' Mrna	Mm.103336	Mouse retinoic acid receptor alpha' Mrna		retinoic acid receptor, alpha	Rara		19401	stomach ; mammary gland ; skin ; embryonic body between diaphragm region and neck ; lymph node ; urinary bladder ; thymus ; embryo ; whole eye ; placenta ; pancreas ; activated spleen ; inner ear ; kidney ; head ; infiltrating ductal carcinoma ; tumor, gross tissue ; retina ; Rathke's pouches ; colon ; Thymus ; liver ; Total pancreas ; spleen ; amnion ; whole brain ; Organ of Corti ; undifferenti…	11	132		GO: molecular function|retinoic acid receptor activity|ISS|GO:0003708|MGI|12466851 GO: molecular function|steroid hormone receptor activity|IEA|GO:0003707|MGI|na GO: molecular function|ligand-dependent nuclear receptor activity|IEA|GO:0004879|MGI|na GO: molecular function|DNA binding|IEA|GO:0003677|MGI|na GO: molecular function|receptor activity|IEA|GO:0004872|MGI|na GO: molecular function|transc…
NM_007407	3.999	0.00046	A	adenylate cyclase activating polypeptide 1 receptor 1	Mm.44245	adenylate cyclase activating polypeptide 1 receptor 1		adenylate cyclase activating polypeptide 1 receptor 1	Adcyap1r1	6 B3	11517	whole brain ; Whole brain ; whole skin ; diencephalon ; fetus ; hypothalamus ; thymus ; cerebellum ; diaphragm ; visual cortex ; Upper Head ; mammary gland ; hippocampus ; brain ; subfornical organ and postrema ; head ; Brain	6	128		GO: molecular function|vasoactive intestinal polypeptide receptor activity|TAS|GO:0004999|MGI|9729410 GO: molecular function|G-protein coupled receptor activity|TAS|GO:0004930|MGI|9729410 GO: biological process|G-protein coupled receptor protein signaling pathway|TAS|GO:0007186|MGI|9729410 GO: biological process|spermatogenesis|IEA|GO:0007283|MGI|na GO: cellular component|membrane|IEA|GO:0016020|…
NM_007579	1.927	0.00713	P	calcium channel, voltage-dependent, N type, alpha 1B	Mm.4424	calcium channel, voltage-dependent, N type, alpha 1B		calcium channel, voltage-dependent, N type, alpha 1B subunit	Cacna1b		12287	whole brain ; Whole brain ; inner ear, 170 pooled ; corpus striatum ; retina ; whole eye ; Kidney ; heart ; head ; medulla oblongata ; pooled lung tumors ; neural retina ; ES Cell (LIF-) ; visual cortex ; otocysts	2	61		GO: molecular function|voltage-gated ion channel activity|IEA|GO:0005244|MGI|na GO: molecular function|ion channel activity|IEA|GO:0005216|MGI|na GO: molecular function|cation channel activity|IEA|GO:0005261|MGI|na GO: molecular function|calcium channel activity|IEA|GO:0005262|MGI|na GO: molecular function|ATP binding|IEA|GO:0005524|MGI|na GO: molecular function|voltage-gated calcium channel acti…
NM_007595	1.903	0.00415	P	Mus musculus calcium/calmodulin-dependent protein kinase II, beta	Mm.4857	Mus musculus calcium/calmodulin-dependent protein kinase II, beta		calcium/calmodulin-dependent protein kinase II, beta	Camk2b		12323	visual cortex ; whole brain ; retina ; brain - normal mediobasal hypothalamus ; brain ; cerebellum ; Whole brain ; pituitary gland ; pancreas ; embryonic limb, maxilla and mandible ; olfactory brain ; hypothalamus ; corpus striatum ; hippocampus ; head ; corpora quadrigemina ; eyeball ; colon ; Brain ; E6.5 whole embryo ; type B spermatogonia, pooled from multiple mice ; neural retina	11	150		GO: molecular function|calcium/calmodulin-dependent protein kinase activity|IEA|GO:0004685|MGI|na GO: molecular function|protein-tyrosine kinase activity|ISS|GO:0004713|MGI|12466851 GO: molecular function|ATP binding|IEA|GO:0005524|MGI|na GO: molecular function|protein serine/threonine kinase activity|IMP|GO:0004674|MGI|12660151 GO: molecular function|calmodulin binding|IEA|GO:0005516|MGI|na GO: …
NM_007836	1.747	0.00273	P	growth arrest dna-damage-inducible 45 alpha	Mm.1236	growth arrest dna-damage-inducible 45 alpha		growth arrest and DNA-damage-inducible 45 alpha	Gadd45a		13197	embryo ; infiltrating ductal carcinoma ; pooled organs ; tumor, metastatic to mammary ; tumor, gross tissue ; Total pancreas ; germinal B-cell ; tumor, biopsy sample ; Diaphragm/Hind limb muscles ; retina ; oviduct ; neural retina ; placenta ; visual cortex ; mammary gland ; pancreas	6	40		GO: molecular function|structural constituent of ribosome|IEA|GO:0003735|MGI|na GO: molecular function|protein binding|IPI|GO:0005515|MGI|12124778 GO: biological process|negative regulation of protein kinase activity|IDA|GO:0006469|MGI|12124778 GO: biological process|cell cycle arrest|IEA|GO:0007050|MGI|na GO: biological process|response to DNA damage stimulus|IEA|GO:0006974|MGI|na GO: biological…
NM_008137	2.347	0.00347		Mus musculus guanine nucleotide binding protein, alpha 14 (Gna14),	Mm.313181	Mus musculus guanine nucleotide binding protein, alpha 14 (Gna14),		guanine nucleotide binding protein, alpha 14	Gna14		14675	tumor, biopsy sample ; stomach ; colon ; inner ear ; bone marrow ; primary cultures of Sertoli cells ; pancreas ; head ; testis ; whole embryo including extraembryonic tissues at 11.5-days postcoitum ; urinary bladder ; colon epithelia progenitor cells ; kidney ; in vitro fertilized eggs ; placenta ; heart ; ovary ; tumor, metastatic to mammary ; Organ of Corti	19	66		GO: molecular function|GTP binding|IEA|GO:0005525|MGI|na GO: molecular function|signal transducer activity|IEA|GO:0004871|MGI|na GO: biological process|protein amino acid ADP-ribosylation|ISS|GO:0006471|MGI|12466851 GO: biological process|G-protein coupled receptor protein signaling pathway|ISS|GO:0007186|MGI|2508088 GO: biological process|signal transduction|IEA|GO:0007165|MGI|na GO: molecular f…
NM_008163	1.83	0.00806	P	Mus musculus growth factor receptor bound protein 2 (Grb2), mRNA.	Mm.6900	Mus musculus growth factor receptor bound protein 2 (Grb2), mRNA.		growth factor receptor bound protein 2	Grb2		14784	visual cortex ; bone marrow ; pituitary gland ; small intestinal epithelial progenitors ; E9.5 whole embryo ; mammary gland ; Rathke's pouches ; whole body ; Pooled thyroids from 5 mice ; whole embryo including extraembryonic tissues at 10.5-days postcoitum ; embryo ; whole brain ; Upper Head ; Gastric Epithelial Progenitor ; whole eye ; embryonic limb, maxilla and mandible ; Whole brain ; kidney…	11	397		GO: molecular function|SH3/SH2 adaptor protein activity|IPI|GO:0005070|MGI|7689150 GO: molecular function|protein binding|IPI|GO:0005515|MGI|11152963,11567986 GO: biological process|RAS protein signal transduction|TAS|GO:0007265|MGI|1322798 GO: biological process|intracellular signaling cascade|IEA|GO:0007242|MGI|na GO: cellular component|vesicle membrane|IDA|GO:0012506|MGI|12147689
NM_008228	3.102	0.00203		Mus musculus histone deacetylase 1 (Hdac1), mRNA.	Mm.311914	Mus musculus histone deacetylase 1 (Hdac1), mRNA.		histone deacetylase 1	Hdac1		15181	bone marrow ; visual cortex ; Rathke's pouches ; 6-day primitive type A spermatogonia ; eye ; pancreas ; Blastocyst ; whole joints ; Laser-captured isthmal cells from tox176 transgenic mice ; Embryonic Stem Cell ; embryo ; fetus ; lung ; Thymus ; tumor, gross tissue ; Liver ; craniofacial tissues ; heart ; infiltrating ductal carcinoma ; mammary gland ; testis ; kidney ; bone (pooled) ; round spe…	4	98		GO: molecular function|histone deacetylase activity|IEA|GO:0004407|MGI|na GO: molecular function|protein binding|IPI|GO:0005515|MGI|12529400,12900441 GO: biological process|regulation of transcription, DNA-dependent|IEA|GO:0006355|MGI|na GO: cellular component|nucleus|IEA|GO:0005634|MGI|na GO: biological process|chromatin modification|IEA|GO:0016568|MGI|na GO: molecular function|hydrolase activit…
NM_008488	1.826	0.00124		Mus musculus Rho guanine nucleotide exchange factor (GEF) 1	Mm.3181	Mus musculus Rho guanine nucleotide exchange factor (GEF) 1		Rho guanine nucleotide exchange factor (GEF) 1	Arhgef1	7 A3	16801	activated spleen ; embryo ; fetus ; lymph node ; pooled organs ; blastocyst ; embryonic body below diaphragm region ; ovary and uterus ; tumor, gross tissue ; Embryonic Stem Cell ; whole body ; mammary gland ; whole embryo including extraembryonic tissues at 13.5-days postcoitum ; Upper Head ; Newborn Kidney ; Hematopoietic Stem Cell (Lin-/c-Kit+/Sca-1-) ; eye ; E9.5 whole embryo ; inner ear ; th…	7	608		GO: molecular function|Rho guanyl-nucleotide exchange factor activity|IEA|GO:0005089|MGI|na GO: molecular function|GTPase activator activity|IEA|GO:0005096|MGI|na GO: molecular function|guanyl-nucleotide exchange factor activity|IEA|GO:0005085|MGI|na GO: biological process|Rho protein signal transduction|IEA|GO:0007266|MGI|na GO: biological process|intracellular signaling cascade|IEA|GO:0007242|M…
NM_008610	2.725	0.0207	A	Mus musculus matrix metalloproteinase 2 (Mmp2), mRNA.	Mm.29564	Mus musculus matrix metalloproteinase 2 (Mmp2), mRNA.		matrix metalloproteinase 2	Mmp2		17390	embryo ; tumor, biopsy sample ; fetus ; kidney ; whole joints ; Whole brain ; Thymus ; skin ; heart ; whole skin ; embryonic body between diaphragm region and neck ; infiltrating ductal carcinoma ; bone ; vagina ; thymus ; cerebellum ; spontaneous tumor, metastatic to mammary. Stem cell origin. ; tumor, gross tissue ; whole embryo including extraembryonic tissues at 10.5-days postcoitum ; Embryon…	8	373		GO: molecular function|gelatinase A activity|IEA|GO:0004228|MGI|na GO: molecular function|metallopeptidase activity|IEA|GO:0008237|MGI|na GO: molecular function|zinc ion binding|IEA|GO:0008270|MGI|na GO: molecular function|metalloendopeptidase activity|IEA|GO:0004222|MGI|na GO: molecular function|calcium ion binding|IEA|GO:0005509|MGI|na GO: biological process|proteolysis and peptidolysis|IEA|GO:…
NM_008894	6.234	0.00011	A	Mus musculus polymerase (DNA directed), delta 2, regulatory subunit	Mm.35788	Mus musculus polymerase (DNA directed), delta 2, regulatory subunit		polymerase (DNA directed), delta 2, regulatory subunit	Pold2	11 A2	18972	Testicles ; embryo ; mammary gland ; eye ; E6.5 whole embryo ; fetus ; heart ; liver ; whole body ; whole skin ; testis ; optic vesicle and lens placode ; tumor, biopsy sample ; Liver ; placenta ; lymph node ; olfactory brain ; medulla oblongata ; infiltrating ductal carcinoma ; corpora quadrigemina ; tumor, gross tissue ; bone marrow ; Rathke's pouches ; head ; Spleen ; spontaneous tumor, metast…	11	185		GO: molecular function|DNA-directed DNA polymerase activity|IEA|GO:0003887|MGI|na GO: biological process|DNA replication|IEA|GO:0006260|MGI|na GO: cellular component|nucleus|IEA|GO:0005634|MGI|na GO: molecular function|transferase activity|IEA|GO:0016740|MGI|na
NM_009271	2.348	0.000236	P	Rous sarcoma oncogene (Src), mRNA	Mm.22845	Rous sarcoma oncogene (Src), mRNA		Rous sarcoma oncogene	Src		20779	cerebellum ; cortex ; tumor, gross tissue ; whole eye ; whole brain ; colon ; oviduct ; salivary gland ; tumor, metastatic to mammary ; tumor, biopsy sample ; spontaneous tumor, metastatic to mammary. Stem cell origin. ; infiltrating ductal carcinoma ; Oviduct ; mammary gland ; embryo ; whole embryo including extraembryonic tissues at 11.5-days postcoitum ; pituitary gland ; placenta ; inner ear …	2	104		GO: molecular function|protein-tyrosine kinase activity|IMP|GO:0004713|MGI|14636584 GO: molecular function|ATP binding|IEA|GO:0005524|MGI|na GO: molecular function|protein serine/threonine kinase activity|ISS|GO:0004674|MGI|12466851 GO: molecular function|protein binding|IPI|GO:0005515|MGI|11274221,11826110 GO: molecular function|protein kinase activity|IDA|GO:0004672|MGI|11274221 GO: biological …
NM_009284	3.409	4.83e-05	A	Mus musculus signal transducer and activator of transcription 6	Mm.121721	Mus musculus signal transducer and activator of transcription 6		signal transducer and activator of transcription 6	Stat6		20852	mammary gland ; bone marrow ; activated spleen ; inner ear ; visual cortex ; liver ; E9.5 whole embryo ; embryo ; thymus ; 6-day primitive type A spermatogonia ; eye ; 18-day leptotene and zygotene spermatocytes ; whole body ; placenta ; RPE/choroid ; Pooled thyroids from 5 mice ; Embryonic Stem Cell ; whole embryo including extraembryonic tissues at 11.5-days postcoitum ; lymph node ; Spleen ; L…	10	207		GO: molecular function|DNA binding|IEA|GO:0003677|MGI|na GO: molecular function|signal transducer activity|IEA|GO:0004871|MGI|na GO: molecular function|transcription factor activity|IEA|GO:0003700|MGI|na GO: biological process|regulation of transcription, DNA-dependent|IEA|GO:0006355|MGI|na GO: biological process|intracellular signaling cascade|IEA|GO:0007242|MGI|na GO: biological process|signal …
NM_009409	3.547	0.00113		Mus musculus topoisomerase (DNA) II beta (Top2b), mRNA.	Mm.130362	Mus musculus topoisomerase (DNA) II beta (Top2b), mRNA.		topoisomerase (DNA) II beta	Top2b	14 A1	21974	Upper Head ; whole brain ; mammary gland ; whole eye ; whole embryo including extraembryonic tissues at 11.5-days postcoitum ; Spleen ; retina ; whole body ; Hematopoietic Stem Cell (Lin-/c-Kit-/Sca-1-) ; kidney ; Laser-captured isthmal cells from tox176 transgenic mice ; fetus ; heart ; head ; Pooled thyroids from 5 mice ; brain ; whole embryo including extraembryonic tissues at 10.5-days postco…	14	417		GO: molecular function|DNA topoisomerase (ATP-hydrolyzing) activity|IEA|GO:0003918|MGI|na GO: molecular function|DNA topoisomerase activity|IEA|GO:0003916|MGI|na GO: molecular function|ATP binding|IEA|GO:0005524|MGI|na GO: molecular function|DNA binding|IEA|GO:0003677|MGI|na GO: biological process|axonogenesis|IMP|GO:0007409|MGI|10615047 GO: biological process|DNA metabolism|IEA|GO:0006259|MGI|na…
NM_009422	2.257	0.00233	P	Tnf receptor-associated factor 2 (Traf2), mRNA	Mm.3399	Tnf receptor-associated factor 2 (Traf2), mRNA		Tnf receptor-associated factor 2	Traf2	2 A3	22030	bone marrow ; mammary gland ; visual cortex ; thymus ; tumor, gross tissue ; E6.5 whole embryo ; whole eye ; embryo ; heart ; Kidney ; Thymus ; testis ; embryonic body between diaphragm region and neck ; aorta and vein ; spontaneous tumor, metastatic to mammary. Stem cell origin. ; whole skin ; kidney ; blastocyst ; head ; Spleen ; tumor, biopsy sample ; salivary gland ; pooled lung tumors ; infi…	2	203		GO: molecular function|zinc ion binding|IEA|GO:0008270|MGI|na GO: biological process|apoptosis|IEA|GO:0006915|MGI|na
NM_009505	1.72	0.0295	A	Mus musculus vascular endothelial growth factor A (Vegfa), mRNA.	Mm.282184	Mus musculus vascular endothelial growth factor A (Vegfa), mRNA.		vascular endothelial growth factor A	Vegfa		22339	mammary gland ; RPE/choroid ; Pooled thyroids from 5 mice ; lung ; placenta ; ovary and uterus ; tumor, gross tissue ; whole brain ; head ; tumor, biopsy sample ; tumor, metastatic to mammary ; medulla oblongata ; infiltrating ductal carcinoma ; liver and lung ; heart ; bone marrow ; diaphragm ; E6.5 whole embryo ; pancreas ; corpora quadrigemina ; spontaneous tumor, metastatic to mammary. Stem c…	17	148		GO: molecular function|heparin binding|IEA|GO:0008201|MGI|na GO: molecular function|growth factor activity|IEA|GO:0008083|MGI|na GO: biological process|mesoderm development|IMP|GO:0007498|MGI|12890722 GO: biological process|cell growth and/or maintenance|IEA|GO:0008151|MGI|na GO: biological process|cell proliferation|IMP|GO:0008283|MGI|na GO: biological process|regulation of cell cycle|IEA|GO:000…
NM_009505_1	1.734	0.00313	P	Mus musculus vascular endothelial growth factor A (Vegfa), mRNA.	Mm.282184	Mus musculus vascular endothelial growth factor A (Vegfa), mRNA.		vascular endothelial growth factor A	Vegfa		22339	mammary gland ; RPE/choroid ; Pooled thyroids from 5 mice ; lung ; placenta ; ovary and uterus ; tumor, gross tissue ; whole brain ; head ; tumor, biopsy sample ; tumor, metastatic to mammary ; medulla oblongata ; infiltrating ductal carcinoma ; liver and lung ; heart ; bone marrow ; diaphragm ; E6.5 whole embryo ; pancreas ; corpora quadrigemina ; spontaneous tumor, metastatic to mammary. Stem c…	17	148		GO: molecular function|heparin binding|IEA|GO:0008201|MGI|na GO: molecular function|growth factor activity|IEA|GO:0008083|MGI|na GO: biological process|mesoderm development|IMP|GO:0007498|MGI|12890722 GO: biological process|cell growth and/or maintenance|IEA|GO:0008151|MGI|na GO: biological process|cell proliferation|IMP|GO:0008283|MGI|na GO: biological process|regulation of cell cycle|IEA|GO:000…
NM_009755	3.993	4.53e-05	A	Mus musculus bone morphogenetic protein 1 (Bmp1), mRNA.	Mm.27757	Mus musculus bone morphogenetic protein 1 (Bmp1), mRNA.		bone morphogenetic protein 1	Bmp1		12153	embryo ; mammary gland ; pooled organs ; whole skin ; Thymus ; lung ; tumor, gross tissue ; whole brain ; whole eye ; Whole eye ; Embryonic Stem Cell ; whole embryo including extraembryonic tissues at 10.5-days postcoitum ; Testicles ; placenta ; uterus ; liver ; mullerian duct includes surrounding region ; stomach ; adipose ; infiltrating ductal carcinoma ; pancreas ; retina ; tumor, biopsy samp…	14	175		GO: molecular function|cytokine activity|IEA|GO:0005125|MGI|na GO: molecular function|growth factor activity|IEA|GO:0008083|MGI|na GO: molecular function|metallopeptidase activity|IEA|GO:0008237|MGI|na GO: molecular function|zinc ion binding|IEA|GO:0008270|MGI|na GO: molecular function|metalloendopeptidase activity|TAS|GO:0004222|MGI|8951074 GO: molecular function|calcium ion binding|IEA|GO:00055…
NM_009793	2.238	0.00279		Mus musculus calcium/calmodulin-dependent protein kinase IV	Mm.158291	Mus musculus calcium/calmodulin-dependent protein kinase IV		calcium/calmodulin-dependent protein kinase IV	Camk4		12326	thymus ; visual cortex ; testis ; Thymus ; cerebellum ; Tcell ; Upper Head ; Whole eye ; Newborn Kidney ; whole brain ; lymph node ; Whole brain ; olfactory brain ; cortex ; hypothalamus ; brain ; Spleen ; spontaneous tumor, metastatic to mammary. Stem cell origin. ; corpora quadrigemina ; retina	18	122		GO: molecular function|calmodulin regulated protein kinase activity|TAS|GO:0004683|MGI|10964952 GO: molecular function|calcium/calmodulin-dependent protein kinase activity|IEA|GO:0004685|MGI|na GO: molecular function|ATP binding|IEA|GO:0005524|MGI|na GO: molecular function|protein serine/threonine kinase activity|IEA|GO:0004674|MGI|na GO: molecular function|calmodulin binding|IEA|GO:0005516|MGI|n…
NM_013684	2.939	0.00122	A	TATA box binding protein (Tbp), mRNA	Mm.244820	TATA box binding protein (Tbp), mRNA		TATA box binding protein	Tbp		21374	Thymus ; Unfertilized Egg ; Trophoblast stem cell ; Upper Head ; E6.5 whole embryo ; lymph node ; embryo ; fetus ; testis ; Tcell ; 4-cell stage embryo ; primary cultures of Sertoli cells ; brain ; bone ; medulla oblongata ; visual cortex ; mammary gland ; placenta ; whole eye ; Embryonic Stem Cell ; lung ; E9.5 whole embryo ; eye ; whole body ; cecum ; diencephalon ; cerebellum ; hypothalamus ; …	17	160		GO: molecular function|protein binding|IPI|GO:0005515|MGI|9050847 GO: molecular function|RNA polymerase II transcription factor activity|IEA|GO:0003702|MGI|na GO: molecular function|DNA binding|IEA|GO:0003677|MGI|na GO: molecular function|transcription factor activity|TAS|GO:0003700|MGI|11861477 GO: biological process|transcription initiation from Pol II promoter|IEA|GO:0006367|MGI|na GO: biologi…
NM_015812	4.073	0.00361	P	regulator of G-protein signaling 6 (Rgs6), mRNA	Mm.153013	regulator of G-protein signaling 6 (Rgs6), mRNA		regulator of G-protein signaling 6	Rgs6		50779	visual cortex ; corpora quadrigemina ; cortex ; kidney ; lung ; head ; hypothalamus ; retina ; Testicles	12	39		GO: molecular function|GTPase activator activity|TAS|GO:0005096|MGI|11342430 GO: molecular function|signal transducer activity|IEA|GO:0004871|MGI|na GO: biological process|G-protein coupled receptor protein signaling pathway|TAS|GO:0007186|MGI|11342430 GO: biological process|intracellular signaling cascade|IEA|GO:0007242|MGI|na GO: biological process|signal transduction|IEA|GO:0007165|MGI|na GO: …
NM_016791	1.84	0.0125		Mus musculus nuclear factor of activated T-cells, cytoplasmic 1	Mm.329560	Mus musculus nuclear factor of activated T-cells, cytoplasmic 1		nuclear factor of activated T-cells, cytoplasmic, calcineurin-dependent 1	Nfatc1		18018	lymph node ; skin ; head ; Pooled thyroids from 5 mice ; heart ; whole brain ; whole embryo including extraembryonic tissues at 10.5-days postcoitum ; ventral midbrain ; stomach ; germinal B-cell from resting spleen ; thymus ; Thymus ; lung ; pancreas ; 8-cell stage embryo ; embryo ; forelimb ; testis ; urinary bladder ; diencephalon ; bone ; vagina ; aorta and vein ; cerebellum ; tumor, biopsy s…	18	134		GO: molecular function|DNA binding|IDA|GO:0003677|MGI|10755616 GO: molecular function|transcription factor activity|IEA|GO:0003700|MGI|na GO: biological process|G1/S transition of mitotic cell cycle|IMP|GO:0000082|MGI|12660151 GO: biological process|calcium ion transport|IMP|GO:0006816|MGI|12660151 GO: biological process|regulation of transcription, DNA-dependent|IEA|GO:0006355|MGI|na GO: cellula…
NM_016811	3.452	0.000141		diacylglycerol kinase, alpha (Dgka), mRNA	Mm.291235	diacylglycerol kinase, alpha (Dgka), mRNA		diacylglycerol kinase, alpha	Dgka		13139	E9.5 whole embryo ; E6.5 whole embryo ; Pooled - Molar ; Hematopoietic Stem Cell (Lin-/c-Kit+/Sca-1+) ; round spermatids, pooled from multiple mice ; RPE/choroid ; Pooled thyroids from 5 mice ; testis ; 18-day leptotene and zygotene spermatocytes ; fetus ; mammary gland ; bone marrow ; pituitary gland ; Thymus ; whole eye ; lymph node ; diaphragm ; melanoma ; blastocyst ; uterus ; tumor, biopsy s…	10	100		GO: molecular function|diacylglycerol kinase activity|IDA|GO:0004143|MGI|12832407 GO: molecular function|phospholipid binding|IDA|GO:0005543|MGI|12944486 GO: molecular function|calcium ion binding|IEA|GO:0005509|MGI|na GO: biological process|protein kinase C activation|IEA|GO:0007205|MGI|na GO: biological process|intracellular signaling cascade|IEA|GO:0007242|MGI|na GO: cellular component|cytosol…
NM_019414	2.075	0.0184		Mus musculus selenium binding protein 2 (Selenbp2), mRNA.	Mm.225405	Mus musculus selenium binding protein 2 (Selenbp2), mRNA.		selenium binding protein 2	Selenbp2		20342	liver ; kidney ; Liver ; spleen ; tumor, biopsy sample ; diaphragm ; small intestnal epithelial progenitor cells ; liver tumor ; amnion	3	66	NULL	NULL
NM_021461	2.142	0.00936	P	MAP kinase-interacting serine/threonine kinase 1	Mm.209327	MAP kinase-interacting serine/threonine kinase 1		MAP kinase-interacting serine/threonine kinase 1	Mknk1	4 D1	17346	visual cortex ; whole body ; activated spleen ; mammary gland ; spleen ; whole joints ; accessory axillary lymph node ; Rathke's pouches ; pancreas ; inner ear ; whole brain ; brain ; E9.5 whole embryo ; brain - normal mediobasal hypothalamus ; Organ of Corti/Ear ; whole eye ; Newborn Kidney ; whole embryo including extraembryonic tissues at 13.5-days postcoitum ; lymph node ; Liver ; whole skin …	4	162		GO: molecular function|protein-tyrosine kinase activity|ISS|GO:0004713|MGI|12466851 GO: molecular function|ATP binding|IEA|GO:0005524|MGI|na GO: molecular function|protein serine/threonine kinase activity|IEA|GO:0004674|MGI|na GO: molecular function|protein kinase activity|ISS|GO:0004672|MGI|12466851 GO: biological process|protein amino acid phosphorylation|ISS|GO:0006468|MGI|12466851 GO: biologi…
NM_023057	3.287	0.0277	A	sterile-alpha motif and leucine zipper containing	Mm.314618	sterile-alpha motif and leucine zipper containing		expressed sequence AV006891	AV006891	2 C3	65964	Hematopoietic Stem Cell (Lin-/c-Kit-/Sca-1-) ; whole body ; mammary gland ; whole brain ; Whole brain ; Upper Head ; Embryonic Stem Cell ; diaphragm ; pituitary ; head ; skin ; germinal B-cell ; hypothalamus ; corpora quadrigemina ; heart ; lung ; tumor, biopsy sample ; ovary ; urinary bladder ; Thymus ; Spleen ; tumor, gross tissue ; infiltrating ductal carcinoma ; Trophoblast stem cell ; neural…	2	81		GO: molecular function|MAP kinase kinase kinase activity|IDA|GO:0004709|MGI|11042189 GO: molecular function|ATP binding|IEA|GO:0005524|MGI|na GO: molecular function|protein serine/threonine kinase activity|IEA|GO:0004674|MGI|na GO: biological process|cytoskeleton organization and biogenesis|IDA|GO:0007010|MGI|11042189 GO: cellular component|cytoplasm|IDA|GO:0005737|MGI|11042189 GO: cellular compo…
NM_023314	2.321	0.00417		eukaryotic translation initiation factor 4E like 3	Mm.227183	eukaryotic translation initiation factor 4E like 3		eukaryotic translation initiation factor 4E like 3	Eif4el3	1 22.2	26987	visual cortex ; liver ; kidney ; bone marrow ; whole brain ; head ; colon ; intestine ; pituitary gland ; primary cultures of Sertoli cells ; whole body ; Trophoblast stem cell ; Newborn Kidney ; eye ; sertoli cells ; Upper Head ; whole embryo including extraembryonic tissues at 13.5-days postcoitum ; cerebellum ; Pooled - Molar ; lung and heart ; embryo ; mammary gland ; Whole brain ; pooled org…	1	351		GO: molecular function|translation initiation factor activity|ISS|GO:0003743|MGI|12466851 GO: molecular function|RNA binding|ISS|GO:0003723|MGI|12466851 GO: biological process|regulation of translation|IEA|GO:0006445|MGI|na GO: biological process|protein biosynthesis|IEA|GO:0006412|MGI|na GO: biological process|translational initiation|ISS|GO:0006413|MGI|12466851 GO: cellular component|cytoplasm|…
NM_023371	5.858	6.74e-06	A	protein (peptidyl-prolyl cis/trans isomerase	Mm.7906	protein (peptidyl-prolyl cis/trans isomerase		protein (peptidyl-prolyl cis/trans isomerase) NIMA-interacting 1	Pin1		23988	visual cortex ; whole body ; heart ; embryo ; whole brain ; cerebellum ; stomach ; kidney ; Testicles ; whole eye ; Rathke's pouches ; Pooled thyroids from 5 mice ; carcinoma ; Whole eye ; whole skin ; blastocyst ; Thymus ; testis ; pancreas ; tongue ; liver ; hippocampus ; head ; tumor, gross tissue ; round spermatids, pooled from multiple mice ; embryonic limb, maxilla and mandible ; dissected …	9	359		GO: molecular function|peptidyl-prolyl cis-trans isomerase activity|IEA|GO:0003755|MGI|na GO: biological process|cell cycle|IEA|GO:0007049|MGI|na GO: biological process|protein folding|IEA|GO:0006457|MGI|na GO: cellular component|nucleus|IEA|GO:0005634|MGI|na GO: molecular function|isomerase activity|IEA|GO:0016853|MGI|na GO: biological process|regulation of cell proliferation|IMP|GO:0042127|MGI|…
NM_138305	2.007	0.00843		adenylate cyclase 3 (Adcy3)	Mm.71996	adenylate cyclase 3 (Adcy3)		adenylate cyclase 3	Adcy3	12 A-B	104111	whole brain ; adipose ; brain ; spermatocytes, pooled from multiple mice ; 6-day primitive type A spermatogonia ; Whole brain ; whole eye ; olfactory mucosa ; Newborn Kidney ; Upper Head ; whole embryo including extraembryonic tissues at 13.5-days postcoitum ; whole embryo including extraembryonic tissues at 10.5-days postcoitum ; embryo ; mammary gland ; head ; liver ; thymus ; aorta and vein ; …	12	62		GO: molecular function|calcium/calmodulin-responsive adenylate cyclase activity|ISS|GO:0008294|MGI|12466851 GO: molecular function|adenylate cyclase activity|TAS|GO:0004016|MGI|7766992,12466851 GO: molecular function|guanylate cyclase activity|ISS|GO:0004383|MGI|12466851 GO: molecular function|protein binding|IPI|GO:0005515|MGI|12122055 GO: molecular function|calmodulin binding|IEA|GO:0005516|MGI…
NM_145519	1.859	0.0115	A	Mus musculus FERM, RhoGEF and pleckstrin domain protein 2 (Farp2),	Mm.243091	Mus musculus FERM, RhoGEF and pleckstrin domain protein 2 (Farp2),		FERM, RhoGEF and pleckstrin domain protein 2 (Farp2), mRNA			352978	kidney ; stomach ; bone marrow ; colon ; liver ; activated spleen ; inner ear ; mammary gland ; visual cortex ; cerebellum ; amnion ; thymus ; E9.5 whole embryo ; tumor, biopsy sample ; Rathke's pouches ; brain ; whole joints ; retina ; lung ; whole embryo including extraembryonic tissues at 11.5-days postcoitum ; embryo ; Osteoblast ; pooled organs ; head ; heart ; testis ; corpus striatum ; pit…		208	NULL	NULL
NM_172285	3.24	4.28e-05		phospholipase C, gamma 2 (Plcg2), mRNA	Mm.192699	phospholipase C, gamma 2 (Plcg2), mRNA		phospholipase C, gamma 2	Plcg2	8 E1	234779	bone marrow ; kidney ; mammary gland ; Thymus ; pituitary gland ; bone ; thymus ; aorta and vein ; tumor, gross tissue ; jejunal and colic lymph node ; Embryonic Stem Cell ; 6-day primitive type A spermatogonia ; Upper Head ; uterus ; blastocyst ; hypothalamus ; embryo ; tumor, biopsy sample ; spleen ; activated spleen ; whole joints ; germinal B-cell ; E9.5 whole embryo ; Spleen ; Hematopoietic …	8	169		GO: molecular function|phospholipase C activity|TAS|GO:0004629|MGI|11744703
NM_175284	4.9	5.76e-05	A	frizzled homolog 10 (Drosophila) (Fzd10)	Mm.197628	frizzled homolog 10 (Drosophila) (Fzd10)		frizzled homolog 10 (Drosophila)	Fzd10	5 G1.3	93897	embryo ; optic vesicle and lens placode ; diencephalon ; thymus ; spinal ganglion ; head ; spinal cord ; lung ; salivary gland ; Newborn Brain ; embryo, late gastrula	5	22		GO: molecular function|G-protein coupled receptor activity|ISS|GO:0004930|MGI|12466851 GO: molecular function|transmembrane receptor activity|ISS|GO:0004888|MGI|12466851 GO: biological process|frizzled signaling pathway|TAS|GO:0007222|MGI|12466851 GO: biological process|G-protein coupled receptor protein signaling pathway|ISS|GO:0007186|MGI|12466851 GO: biological process|development|ISS|GO:00072…
NM_175770	2.019	0.00202	P	TAF7 RNA polymerase II, TATA box binding protein	Mm.236009	TAF7 RNA polymerase II, TATA box binding protein		TAF7 RNA polymerase II, TATA box binding protein (TBP)-associated factor	Taf7	18 B3	24074	thymus ; bone marrow ; placenta ; Upper Head ; Embryonic Stem Cell ; 8-cell stage embryo ; 4-cell stage embryo ; embryo ; visual cortex ; epididymis ; skin ; blastocyst ; forelimb ; testis ; diaphragm ; in vitro fertilized eggs ; mammary gland ; oviduct ; embryonic body between diaphragm region and neck ; Spleen ; Pituitary gland ; whole embryo ; retina ; tumor, biopsy sample ; Undifferentiated E…	18	121		GO: molecular function|RNA polymerase II transcription factor activity|IDA|GO:0003702|MGI|10438527 GO: biological process|regulation of transcription, DNA-dependent|IEA|GO:0006355|MGI|na GO: biological process|transcription from Pol II promoter|IDA|GO:0006366|MGI|10438527 GO: cellular component|transcription factor TFIID complex|IDA|GO:0005669|MGI|10438527 GO: cellular component|nucleus|IEA|GO:00…
NM_176933	2.014	0.0127	P	dual specificity phosphatase 4 (Dusp4), mRNA	Mm.170276	dual specificity phosphatase 4 (Dusp4), mRNA		dual specificity phosphatase 4	Dusp4	8 A3	319520	whole brain ; tumor, gross tissue ; Whole brain ; whole eye ; placenta ; RPE/choroid ; retina ; E6.5 whole embryo ; Embryonic Stem Cell ; whole embryo including extraembryonic tissues at 10.5-days postcoitum ; whole embryo including extraembryonic tissues at 11.5-days postcoitum ; embryo ; inner ear ; mammary gland ; kidney ; fetus ; whole skin ; infiltrating ductal carcinoma ; lung ; primary cul…	8	149		GO: molecular function|protein tyrosine/serine/threonine phosphatase activity|ISS|GO:0008138|MGI|12466851 GO: molecular function|protein serine/threonine phosphatase activity|ISS|GO:0004722|MGI|12466851 GO: molecular function|protein phosphatase type 1 activity|ISS|GO:0000163|MGI|12466851 GO: molecular function|protein phosphatase type 2C activity|ISS|GO:0015071|MGI|12466851 GO: molecular functio…
U15784	2.357	0.00415		Shcp52 (Shc) mRNA, complete	Mm.86595	Shcp52 (Shc) mRNA, complete		src homology 2 domain-containing transforming protein C1	Shc1		20416	Pooled - Molar ; whole eye ; whole brain ; Newborn Kidney ; whole joints ; RPE/choroid ; Upper Head ; Embryonic Stem Cell ; mammary gland ; lymph node ; E6.5 whole embryo ; spermatocytes, pooled from multiple mice ; Thymus ; blastocyst ; heart ; liver ; Kidney ; tumor, gross tissue ; whole body ; embryo ; decidual tissue (day 6.5-8.5 of gestation) ; Liver ; epididymis ; bowel ; embryonic body bet…	3	192		GO: molecular function|protein binding|IPI|GO:0005515|MGI|11877420 GO: biological process|cell growth and/or maintenance|IEA|GO:0008151|MGI|na GO: biological process|intracellular signaling cascade|IEA|GO:0007242|MGI|na GO: biological process|regulation of cell growth|IEA|GO:0001558|MGI|na
u39391	3.035	0.00371		5-hydroxytryptamine 1A receptor(5HT-1A);serotonin receptor	Mm.4716	5-hydroxytryptamine 1A receptor(5HT-1A);serotonin receptor		5-hydroxytryptamine (serotonin) receptor 1A	Htr1a		15550	visual cortex ; corpora quadrigemina ; cortex ; diencephalon ; head ; hippocampus ; hypothalamus ; brain ; olfactory brain ; subfornical organ and postrema ; otocysts	13	49		GO: molecular function|neuropeptide Y receptor activity|ISS|GO:0004983|MGI|12466851 GO: molecular function|serotonin receptor activity|ISS|GO:0004993|MGI|12466851 GO: molecular function|G-protein coupled receptor activity|IEA|GO:0004930|MGI|na GO: biological process|G-protein coupled receptor protein signaling pathway|IEA|GO:0007186|MGI|na GO: cellular component|integral to membrane|TAS|GO:001602…
U43184	5.693	0.000154	A	death domain protein FADD (FADD) mRNA, complete cds	Mm.5126	death domain protein FADD (FADD) mRNA, complete cds		Fas (TNFRSF6)-associated via death domain	Fadd		14082	mammary gland ; bone marrow ; whole joints ; pancreas ; heart ; visual cortex ; liver ; Whole brain ; embryo ; Thymus ; RPE/choroid ; whole embryo including extraembryonic tissues at 10.5-days postcoitum ; lymph node ; uterus ; whole skin ; stomach ; tongue ; head ; testis ; Tcell ; pituitary gland ; urinary bladder ; thymus ; lung ; kidney ; eyeball ; ovary ; tumor, biopsy sample ; activated spl…	7	117		GO: biological process|apoptotic program|IMP|GO:0008632|MGI|13679421 GO: biological process|apoptosis|ISS|GO:0006915|MGI|12819136 GO: biological process|signal transduction|IEA|GO:0007165|MGI|na GO: biological process|regulation of apoptosis|IMP|GO:0042981|MGI|12819136,13679421
U67321	7.544	3.1e-07	A	caspase-7;lice1,LCE-LAP3 cysteine protease	Mm.35687	caspase-7;lice1,LCE-LAP3 cysteine protease		caspase 7	Casp7		12369	Embryonic Stem Cell ; Spleen ; embryo ; whole eye ; heart ; fetus ; Thymus ; head ; mammary gland ; whole embryo including extraembryonic tissues at 13.5-days postcoitum ; Whole eye ; kidney ; lung ; eyeball ; colon ; bone marrow ; cecum ; infiltrating ductal carcinoma ; brain ; embryonic body between diaphragm region and neck ; urinary bladder ; vagina ; thymus ; cerebellum ; spontaneous tumor, …	19	112		GO: molecular function|cysteine-type peptidase activity|IEA|GO:0008234|MGI|na GO: biological process|induction of apoptosis|ISS|GO:0006917|MGI|12819136 GO: biological process|proteolysis and peptidolysis|ISS|GO:0006508|MGI|12819136 GO: biological process|apoptosis|IEA|GO:0006915|MGI|na GO: molecular function|hydrolase activity|IEA|GO:0016787|MGI|na GO: molecular function|caspase activity|ISS|GO:0…
U70068	2.974	0.00089		woltag-gated potassium channal protein KQT-LIKE 1(KVLQT1);POTASSIUM VOTATAGE-GATED CHANNAL SUBFAMILY Q MEMBER 1(KCNQ1);KCNA9;KV1.9	Mm.5177	woltag-gated potassium channal protein KQT-LIKE 1(KVLQT1);POTASSIUM VOTATAGE-GATED CHANNAL SUBFAMILY Q MEMBER 1(KCNQ1);KCNA9;KV1.9		potassium voltage-gated channel, subfamily Q, member 1	Kcnq1		16535	tumor, gross tissue ; stomach ; urogenital ridge (embryonic) ; heart ; salivary gland ; colon ; eyeball ; inner ear ; tumor, metastatic to mammary ; gall bladder ; aorta and vein ; olfactory epithelium	7	38		GO: molecular function|voltage-gated ion channel activity|IEA|GO:0005244|MGI|na GO: molecular function|ion channel activity|IEA|GO:0005216|MGI|na GO: molecular function|cation channel activity|IEA|GO:0005261|MGI|na GO: molecular function|voltage-gated potassium channel activity|IEA|GO:0005249|MGI|na GO: molecular function|potassium channel activity|IEA|GO:0005267|MGI|na GO: biological process|cat…
U93848	2.817	3.31e-05	A	elongation factor-2 kinase mRNA	Mm.25997	elongation factor-2 kinase mRNA		eukaryotic elongation factor-2 kinase	Eef2k	7 F2	13631	whole body ; lung ; Whole brain ; whole brain ; whole joints ; Rathke's pouches ; kidney ; mammary gland ; bone marrow ; heart ; Upper Head ; placenta ; whole eye ; whole embryo including extraembryonic tissues at 13.5-days postcoitum ; embryo ; tongue ; skin ; tumor, biopsy sample ; in vitro fertilized eggs ; aorta and vein ; bone ; corpora quadrigemina ; spinal cord ; infiltrating ductal carcin…	7	169		GO: molecular function|ATP binding|IEA|GO:0005524|MGI|na GO: molecular function|protein serine/threonine kinase activity|IEA|GO:0004674|MGI|na GO: molecular function|calmodulin binding|IEA|GO:0005516|MGI|na GO: biological process|protein amino acid phosphorylation|IEA|GO:0006468|MGI|na GO: molecular function|transferase activity|IEA|GO:0016740|MGI|na
X01389	3.226	0.000766		gamma subunit of nerve growth factor (NGF).	Mm.347471	gamma subunit of nerve growth factor (NGF).		nerve growth factor, gamma	Ngfg		18050	salivary gland ; pancreas ; carcinoma ; testis	7	20		GO: molecular function|trypsin activity|IEA|GO:0004295|MGI|na GO: molecular function|tissue kallikrein activity|IEA|GO:0004293|MGI|na GO: molecular function|serine-type endopeptidase activity|IEA|GO:0004252|MGI|na GO: molecular function|growth factor activity|IEA|GO:0008083|MGI|na GO: molecular function|peptidase activity|IEA|GO:0008233|MGI|na GO: molecular function|receptor signaling protein act…
X51975	1.712	0.0421	P	INTERLEUKIN-6receptor alpha subnit precursor (IL-6R;IL1RB)	Mm.2856	INTERLEUKIN-6receptor alpha subnit precursor (IL-6R;IL1RB)		interleukin 6 receptor, alpha	Il6ra		16194	urinary bladder ; Liver ; germinal B-cell ; germinal B-cell from resting spleen ; retina ; corpora quadrigemina ; oviduct ; spleen ; tumor, biopsy sample ; liver ; cerebellum ; Trophoblast ; Fetal Liver ; Hematopoietic	3	27		GO: molecular function|interleukin receptor activity|IEA|GO:0004907|MGI|na GO: molecular function|receptor activity|IEA|GO:0004872|MGI|na GO: biological process|cell surface receptor linked signal transduction|IEA|GO:0007166|MGI|na GO: cellular component|membrane|IEA|GO:0016020|MGI|na GO: cellular component|integral to membrane|TAS|GO:0016021|MGI|12466851 GO: cellular component|integral to plasma…
X56230	1.907	0.00491	A	M.musculus OCT-1 mRNA for octamer-binding protein.	Mm.245261	OCTAMER-BINDINGtranscription factor (OCT1;OFT1);POU2F1;NF-A1		POU domain, class 2, transcription factor 1	Pou2f1		18986	retina ; Whole eye ; Upper Head ; Embryonic Stem Cell ; testis ; forelimb ; whole body ; diencephalon ; thymus ; kidney ; visual cortex ; parthenogenote ; cerebellum ; cortex ; lung ; infiltrating ductal carcinoma ; Thymus ; Rathke's pouches ; E6.5 whole embryo ; mandible ; pooled lung tumors ; egg ; neural retina ; Undifferentiated ES Cell	1	79		GO: molecular function|DNA binding|IEA|GO:0003677|MGI|na GO: molecular function|transcription factor activity|IEA|GO:0003700|MGI|na GO: biological process|regulation of transcription, DNA-dependent|IEA|GO:0006355|MGI|na GO: cellular component|transcription factor complex|IEA|GO:0005667|MGI|na GO: cellular component|nucleus|IEA|GO:0005634|MGI|na
X57413	2.19	0.0312	P	transforming growth factor beta 2 precursor(TGF-beta 2;TGFB2)	Mm.18213	transforming growth factor beta 2 precursor(TGF-beta 2;TGFB2)		transforming growth factor, beta 2	Tgfb2		21808	whole body ; Rathke's pouches ; tumor, biopsy sample ; Organ of Corti/Ear ; retina ; pancreas ; Pooled - Molar ; whole embryo including extraembryonic tissues at 13.5-days postcoitum ; embryo ; melanoma ; kidney ; uterus ; testis ; head ; ovary and uterus ; in vitro fertilized eggs ; thymus ; embryonic body between diaphragm region and neck ; cerebellum ; mammary gland ; whole brain ; egg ; lung …	1	245		GO: molecular function|growth factor activity|IEA|GO:0008083|MGI|na GO: molecular function|transforming growth factor beta receptor binding|IEA|GO:0005160|MGI|na GO: biological process|cell proliferation|IEA|GO:0008283|MGI|na GO: biological process|regulation of cell cycle|IEA|GO:0000074|MGI|na GO: cellular component|extracellular space|TAS|GO:0005615|MGI|12466851 GO: biological process|cell grow…
x63615	1.81	0.000932	P	camk2;calmodulin-depengent protein kinnase2(beta subnit)	Mm.4857	camk2;calmodulin-depengent protein kinnase2(beta subnit)		calcium/calmodulin-dependent protein kinase II, beta	Camk2b		12323	visual cortex ; whole brain ; retina ; brain - normal mediobasal hypothalamus ; brain ; cerebellum ; Whole brain ; pituitary gland ; pancreas ; embryonic limb, maxilla and mandible ; olfactory brain ; hypothalamus ; corpus striatum ; hippocampus ; head ; corpora quadrigemina ; eyeball ; colon ; Brain ; E6.5 whole embryo ; type B spermatogonia, pooled from multiple mice ; neural retina	11	150		GO: molecular function|calcium/calmodulin-dependent protein kinase activity|IEA|GO:0004685|MGI|na GO: molecular function|protein-tyrosine kinase activity|ISS|GO:0004713|MGI|12466851 GO: molecular function|ATP binding|IEA|GO:0005524|MGI|na GO: molecular function|protein serine/threonine kinase activity|IMP|GO:0004674|MGI|12660151 GO: molecular function|calmodulin binding|IEA|GO:0005516|MGI|na GO: …
X64840	5.316	0.000515		M.musculus ALF1 mRNA.	Mm.36894	transcription factor 12(tcf12);basic helix-loop-helix ALF1 PROTEIN;E-box binding protein;HTF4;ME1		transcription factor 12	Tcf12		21406	Upper Head ; whole brain ; whole eye ; E9.5 whole embryo ; pancreas ; mammary gland ; Pooled thyroids from 5 mice ; whole embryo including extraembryonic tissues at 13.5-days postcoitum ; Embryonic Stem Cell ; whole embryo including extraembryonic tissues at 10.5-days postcoitum ; embryo ; melanoma ; Thymus ; Rathke's pouches ; Hematopoietic Stem Cell (Lin-/c-Kit-/Sca-1-) ; visual cortex ; thymus…	9	239		GO: molecular function|DNA binding|IDA|GO:0003677|MGI|1321336 GO: biological process|regulation of transcription, DNA-dependent|IEA|GO:0006355|MGI|na GO: biological process|development|IEA|GO:0007275|MGI|na GO: biological process|regulation of transcription from Pol II promoter|IDA|GO:0006357|MGI|1321336 GO: cellular component|transcription factor complex|IEA|GO:0005667|MGI|na GO: cellular compon…
X70800	1.856	0.00752		M.musculus wnt-11 mRNA	Mm.22182	M.musculus wnt-11 mRNA		wingless-related MMTV integration site 11	Wnt11		22411	Spleen ; fetus ; Thymus ; head ; forelimb ; testis ; aorta and vein ; embryonic body between diaphragm region and neck ; urinary bladder ; kidney ; heart ; tongue ; oviduct	7	32		GO: molecular function|receptor binding|TAS|GO:0005102|MGI|9889131 GO: molecular function|signal transducer activity|IEA|GO:0004871|MGI|na GO: biological process|development|IEA|GO:0007275|MGI|na GO: biological process|signal transduction|TAS|GO:0007165|MGI|9889131 GO: biological process|cell-cell signaling|TAS|GO:0007267|MGI|9889131 GO: cellular component|extracellular|ISS|GO:0005576|MGI|1246685…
x72395	3.952	0.00306	A	5-hydroxytryptamine(serotonin)receptor 3	Mm.4831	5-hydroxytryptamine(serotonin)receptor 3		5-hydroxytryptamine (serotonin) receptor 3A	Htr3a	9 A5.3	15561	visual cortex ; urinary bladder ; aorta and vein ; whole body ; cerebellum ; head ; spinal ganglion ; sympathetic ganglion ; cortex	9	36		GO: molecular function|extracellular ligand-gated ion channel activity|IEA|GO:0005230|MGI|na GO: molecular function|ion channel activity|IEA|GO:0005216|MGI|na GO: molecular function|receptor activity|IEA|GO:0004872|MGI|na GO: biological process|transport|IEA|GO:0006810|MGI|na GO: biological process|ion transport|IEA|GO:0006811|MGI|na GO: biological process|synaptic transmission|IEA|GO:0007268|MGI…
X76850	1.87	0.00207		MAPKAPK-A;MAP kinase-activated protein kinase;mapkap kinase 2	Mm.221235	MAPKAPK-A;MAP kinase-activated protein kinase;mapkap kinase 2		MAP kinase-activated protein kinase 2	Mapkapk2	1 E4	17164	Whole eye ; Pooled thyroids from 5 mice ; whole embryo including extraembryonic tissues at 11.5-days postcoitum ; embryo ; bone marrow ; heart ; pancreas ; carcinoma ; Spleen ; bone (pooled) ; small intestinal epithelial progenitors ; whole skin ; lymph node ; Upper Head ; pooled organs ; fetus ; mammary gland ; embryonic limb, maxilla and mandible ; head ; macrophage ; blastocyst ; kidney ; vagi…	1	326		GO: molecular function|protein-tyrosine kinase activity|ISS|GO:0004713|MGI|12466851 GO: molecular function|ATP binding|IEA|GO:0005524|MGI|na GO: molecular function|protein serine/threonine kinase activity|IEA|GO:0004674|MGI|na GO: molecular function|protein kinase activity|IEA|GO:0004672|MGI|na GO: biological process|protein amino acid phosphorylation|IEA|GO:0006468|MGI|na GO: molecular function|…
X84311	2.408	0.000227		G2/mitotic-specific cyclin E2(CCNE2)	Mm.4815	G2/mitotic-specific cyclin E2(CCNE2)		cyclin A1	Ccna1	3 C	12427	testis ; cerebellum ; Testicles ; visual cortex ; Laser-captured isthmal cells from tox176 transgenic mice	3	23		GO: molecular function|protein binding|IPI|GO:0005515|MGI|11980909 GO: biological process|meiosis|IEA|GO:0007126|MGI|na GO: biological process|cell cycle|IEA|GO:0007049|MGI|na GO: biological process|mitosis|IEA|GO:0007067|MGI|na GO: biological process|spermatogenesis|IEA|GO:0007283|MGI|na GO: biological process|regulation of cell cycle|IEA|GO:0000074|MGI|na GO: cellular component|nucleus|IEA|GO:0…
X86925	1.896	0.011		E2F5 TRANSCRIPTION FACTOR	Mm.153415	E2F5 TRANSCRIPTION FACTOR		E2F transcription factor 5	E2f5	3 A1	13559	brain - normal mediobasal hypothalamus ; Pooled - Molar ; whole eye ; Upper Head ; Newborn Brain ; Embryonic Stem Cell ; embryo ; uterus ; embryonic limb, maxilla and mandible ; inner ear ; activated spleen ; kidney ; cerebellum ; mammary gland ; placenta ; pancreas ; visual cortex ; stomach ; head ; testis ; in vitro fertilized eggs ; hippocampus ; skin ; bone marrow ; colon ; cecum ; embryonic …	3	139		GO: molecular function|DNA binding|IEA|GO:0003677|MGI|na GO: molecular function|transcription factor activity|IDA|GO:0003700|MGI|9553039,11591818 GO: biological process|G1/S transition of mitotic cell cycle|TAS|GO:0000082|MGI|9553039 GO: biological process|regulation of transcription, DNA-dependent|IDA|GO:0006355|MGI|11591818 GO: biological process|regulation of cell cycle|TAS|GO:0000074|MGI|9553…
X90648	1.702	0.0147		mRNA for Crkl protein	Mm.21048	mRNA for Crkl protein		v-crk sarcoma virus CT10 oncogene homolog (avian)-like	Crkl	16 A1	12929	whole embryo including extraembryonic tissues at 13.5-days postcoitum ; Embryonic Stem Cell ; lung ; whole brain ; Upper Head ; pancreas ; whole eye ; Organ of Corti/Ear ; E6.5 whole embryo ; bone marrow ; Whole brain ; E9.5 whole embryo ; brain ; thymus ; kidney ; Rathke's pouches ; whole body ; Spleen ; spleen ; lymph node ; heart ; whole embryo including extraembryonic tissues at 10.5-days pos…	16	330		GO: biological process|cell growth and/or maintenance|IEA|GO:0008151|MGI|na GO: biological process|intracellular signaling cascade|IEA|GO:0007242|MGI|na GO: biological process|regulation of cell cycle|IEA|GO:0000074|MGI|na GO: cellular component|intracellular|IEA|GO:0005622|MGI|na GO: biological process|organogenesis|IMP|GO:0009887|MGI|11242111
X97052	2.422	0.000159		MAPKK6;MAP kinase kinase 6(dual specificity)(MKK6)	Mm.14487	MAPKK6;MAP kinase kinase 6(dual specificity)(MKK6)		mitogen activated protein kinase kinase 6	Map2k6	11 E2	26399	visual cortex ; whole eye ; embryonic limb, maxilla and mandible ; colon epithelia progenitor cells ; activated spleen ; Whole brain ; small intestinal epithelial progenitors ; placenta ; whole embryo including extraembryonic tissues at 10.5-days postcoitum ; Thymus ; head ; embryo ; heart ; kidney ; testis ; embryonic body between diaphragm region and neck ; thymus ; cerebellum ; parthenogenote …	11	117		GO: molecular function|protein-tyrosine kinase activity|IEA|GO:0004713|MGI|na GO: molecular function|ATP binding|IEA|GO:0005524|MGI|na GO: molecular function|protein serine/threonine kinase activity|IEA|GO:0004674|MGI|na GO: molecular function|protein kinase activity|IEA|GO:0004672|MGI|na GO: biological process|MAPKKK cascade|IPI|GO:0000165|MGI|12556533 GO: biological process|protein amino acid p…
XM_355754	1.744	0.00673	P	oncogene mRNA, complete	Mm.245513	oncogene mRNA, complete		Braf transforming gene	Braf		109880	mammary gland ; blastocyst ; whole eye ; whole embryo including extraembryonic tissues at 11.5-days postcoitum ; Tcell ; whole skin ; thymus ; embryo ; eyeball ; diencephalon ; adrenal gland ; adipose ; medulla oblongata ; spontaneous tumor, metastatic to mammary. Stem cell origin. ; Thymus ; tumor, metastatic to mammary ; Newborn Kidney ; Total pancreas ; tumor, biopsy sample ; Embryonic Stem Ce…	6	82		GO: molecular function|receptor signaling protein activity|ISS|GO:0005057|MGI|12466851 GO: biological process|intracellular signaling cascade|ISS|GO:0007242|MGI|12466851 GO: biological process|signal transduction|ISS|GO:0007165|MGI|12466851
XM_484162	4.772	0.000107	A	Mus musculus mutL homolog 3 (E coli) (Mlh3), mRNA.	Mm.103114	Mus musculus mutL homolog 3 (E coli) (Mlh3), mRNA.		mutL homolog 3 (E coli)	Mlh3	12 D1	217716	whole brain ; Upper Head ; Embryonic Stem Cell ; embryo ; Whole brain ; mammary gland ; testis ; whole eye ; cerebellum ; thymus ; tumor, gross tissue ; germinal B-cell from resting spleen ; spinal cord ; spinal ganglion ; kidney ; Thymus ; heart ; germinal B-cell ; Trophoblast stem cell	12	50		GO: molecular function|chromatin binding|IDA|GO:0003682|MGI|12091911 GO: biological process|male meiosis|IMP|GO:0007140|MGI|12091911 GO: cellular component|chiasma|IDA|GO:0005712|MGI|12091911 GO: biological process|female meiosis I|IMP|GO:0007144|MGI|12091911 GO: cellular component|condensed chromosome|IDA|GO:0000793|MGI|12091911
Y00671	2.485	0.000746	A	met proto-oncogene	Mm.86844	met proto-oncogene		met proto-oncogene	Met		17295	whole eye ; RPE/choroid ; Upper Head ; whole embryo including extraembryonic tissues at 13.5-days postcoitum ; pancreas ; infiltrating ductal carcinoma ; Pancreatic Bud ; tumor, biopsy sample ; tumor, metastatic to mammary ; Mesenchymal stem cell ; tumor, gross tissue ; Whole brain ; spontaneous tumor, metastatic to mammary. Stem cell origin. ; Newborn Kidney ; undifferentiated limb	6	29		GO: molecular function|protein-tyrosine kinase activity|IEA|GO:0004713|MGI|na GO: molecular function|ATP binding|IEA|GO:0005524|MGI|na GO: molecular function|protein serine/threonine kinase activity|ISS|GO:0004674|MGI|12466851 GO: molecular function|receptor activity|IEA|GO:0004872|MGI|na GO: molecular function|protein kinase activity|IEA|GO:0004672|MGI|na GO: biological process|brain development…
Z11574	1.834	0.00657	P	mRNA for son of sevenless 1	Mm.60975	mRNA for son of sevenless 1		Son of sevenless homolog 1 (Drosophila)	Sos1		20662	4-cell stage embryo ; medulla oblongata ; Hematopoietic Stem Cell (Lin-/c-Kit-/Sca-1+) ; melanoma ; testis ; skin ; hypothalamus ; aorta and vein ; cortex ; retina ; corpora quadrigemina ; spinal cord ; cerebellum ; eyeball ; heart ; head ; lung ; primary sorted bone marrow cells ; ovary ; Spleen ; adrenal gland ; adipose ; embryo ; whole brain ; Upper Head ; submandibular gland ; Embryonic Stem …	17	103		GO: molecular function|DNA binding|IEA|GO:0003677|MGI|na GO: molecular function|guanyl-nucleotide exchange factor activity|IEA|GO:0005085|MGI|na GO: biological process|small GTPase mediated signal transduction|IEA|GO:0007264|MGI|na GO: biological process|intracellular signaling cascade|IEA|GO:0007242|MGI|na
Z14224	5.517	1.7e-06	A	5-hydroxytryptamine serotonin receptor 1E(beta)	Mm.5040	5-hydroxytryptamine serotonin receptor 1E(beta)		5-hydroxytryptamine (serotonin) receptor 1F	Htr1f		15557	cortex ; corpora quadrigemina ; visual cortex	16	9		GO: molecular function|serotonin receptor activity|ISS|GO:0004993|MGI|12466851 GO: molecular function|G-protein coupled receptor activity|IEA|GO:0004930|MGI|na GO: molecular function|receptor activity|IEA|GO:0004872|MGI|na GO: biological process|G-protein coupled receptor protein signaling pathway|IEA|GO:0007186|MGI|na GO: cellular component|integral to membrane|TAS|GO:0016021|MGI|12466851 GO: mo…
z23107	1.868	0.00662		5-hydroxytryptamine serotonin receptor 7	Mm.254266	5-hydroxytryptamine serotonin receptor 7		5-hydroxytryptamine (serotonin) receptor 7	Htr7		15566	thymus ; diencephalon ; whole brain	19	17		GO: molecular function|serotonin receptor activity|ISS|GO:0004993|MGI|12466851 GO: molecular function|G-protein coupled receptor activity|IEA|GO:0004930|MGI|na GO: molecular function|receptor activity|IEA|GO:0004872|MGI|na GO: biological process|G-protein coupled receptor protein signaling pathway|IEA|GO:0007186|MGI|na GO: cellular component|integral to membrane|TAS|GO:0016021|MGI|12466851 GO: mo…
Z48538	2.883	0.000588	A	Stat5a;mamary gland factor	Mm.277403	Stat5a;mamary gland factor		signal transducer and activator of transcription 5A	Stat5a		20850	thymus ; tumor, gross tissue ; mammary gland ; lymph node ; Laser-captured isthmal cells from tox176 transgenic mice ; visual cortex ; oviduct ; aorta and vein ; kidney ; in vitro fertilized eggs ; Osteoblast ; bone marrow ; skin ; urinary bladder ; whole joints ; bone ; tumor, biopsy sample ; spontaneous tumor, metastatic to mammary. Stem cell origin. ; vagina ; tumor, metastatic to mammary ; sp…	11	140		GO: molecular function|copper ion binding|ISS|GO:0005507|MGI|12466851 GO: molecular function|electron transporter activity|ISS|GO:0005489|MGI|12466851 GO: molecular function|DNA binding|IDA|GO:0003677|MGI|12147240 GO: molecular function|signal transducer activity|IEA|GO:0004871|MGI|na GO: molecular function|transcription factor activity|IEA|GO:0003700|MGI|na GO: biological process|lactation|IMP|G…
